# Supplementary material
Source: PubMed Central journal article supplement (PMC4104750)

## SUPPLEMENTAL MATERIAL

**Supplemental Table 1** – Assays and instruments used by each study to measure C-reactive protein levels in participants.

|        |                                                                                               |                    |                           |                                       |                                              |                                                 |
|--------|-----------------------------------------------------------------------------------------------|--------------------|---------------------------|---------------------------------------|----------------------------------------------|-------------------------------------------------|
| Study  | Assay                                                                                         |                    |                           |                                       |                                              |                                                 |
| ARIC   | Latex particle enhanced immunoturbidimetric assay - hsCRP                                     |                    |                           |                                       |                                              |                                                 |
| CHS    | High sensitivity ELISA and Latex-enhanced nephelometry                                        |                    |                           |                                       |                                              |                                                 |
| CARDIA | High Sensitivity CRP - particle enhanced immunonephelometry                                   |                    |                           |                                       |                                              |                                                 |
| SHS    | ELISA developed in-house using purified CRP and anti-CRP antibodies from Calbiochem           |                    |                           |                                       |                                              |                                                 |
| EAGLE  | Latex-enhanced nephelometry (N High Sensitivity CRP assay)                                    |                    |                           |                                       |                                              |                                                 |
| WHI    | Immunoturbidimetric assay with reagents and calibrators (Denka Seiken Co Ltd, Niigata, Japan) |                    |                           |                                       |                                              |                                                 |
|        | Dade Behring N Latex High Sensitivity hsCRP mono assay                                        |                    |                           |                                       |                                              |                                                 |
| MEC    | CRP High Sensitivity latex particle enhanced immunoturbidimetric assay (POINTE Scientific)    |                    |                           |                                       |                                              |                                                 |
|        |                                                                                               |                    |                           |                                       |                                              |                                                 |
| Study  | Instrument                                                                                    |                    |                           |                                       |                                              |                                                 |
| ARIC   |                                                                                               |                    |                           |                                       |                                              |                                                 |
| CHS    | BN II nephelometer (Dade Behring Inc.)                                                        |                    |                           |                                       |                                              |                                                 |
| CARDIA | BNII nephelometer from Siemens                                                                |                    |                           |                                       |                                              |                                                 |
| SHS    |                                                                                               |                    |                           |                                       |                                              |                                                 |
| EAGLE  | BN II nephelometer (Dade Behring Inc.)                                                        |                    |                           |                                       |                                              |                                                 |
| WHI    | Hitachi 911; Roche Diagnostics, Indianapolis, Indiana                                         |                    |                           |                                       |                                              |                                                 |
|        | Behring Nephelometer II (Dade Behring Inc., Newark, Delaware)                                 |                    |                           |                                       |                                              |                                                 |
| MEC    | Cobas MiraPlus CC clinical autoanalyzer (Roche Diagnostics)                                   |                    |                           |                                       |                                              |                                                 |
|        |                                                                                               |                    |                           |                                       |                                              |                                                 |
|        |                                                                                               |                    |                           |                                       |                                              |                                                 |
| Study  | Unit of measurement                                                                           | Limit of detection | Measured in a single lab? | Repeated measurements for same visit? | Repeated measurements for subsequent visits? | Coefficients of variation for repeated measures |
| ARIC   | mg/dL                                                                                         | 0.05 mg/dL         | Yes                       |                                       | No                                           | 19.2%, 421 pairs                                |
| CHS    | mg/L                                                                                          | 0.18 mg/L          | Yes                       | Limited                               | Yes                                          | 8.9% (assay), 5% (instrument)                   |
| CARDIA | ug/mL                                                                                         |                    | Yes                       | No                                    | Yes                                          | average 1.6 - 6.7%                              |
| SHS    | mg/L                                                                                          |                    | Yes                       |                                       |                                              | 8%                                              |
| EAGLE  | mg/dL                                                                                         | 0.01 mg/dL         | Yes                       | No                                    | No                                           | range 4.9 - 7.8%                                |
| WHI    | mg/L                                                                                          |                    | Yes                       | No                                    | No                                           | 1.61%                                           |
|        | mg/L                                                                                          |                    | No                        | No                                    | No                                           |                                                 |
| MEC    | mg/dL                                                                                         | 0.1 mg/dL          | Yes                       | No                                    | No                                           | 3 - 5%                                          |

**Supplemental Table 2** – Demographic and epidemiologic characteristics of study populations used in this analysis (by study and race/ethnicity).

| Measure / Unit              | Race/Ethnicity         | WHI             | EAGLE           | MEC             | ARIC            | CARDIA          | CHS             | SHS             | Total |
|-----------------------------|------------------------|-----------------|-----------------|-----------------|-----------------|-----------------|-----------------|-----------------|-------|
| Sample size<br>n            | European American      | 6889            | 4001            | 277             | 8774            | 1754            | 3263            | .               | 24958 |
|                             | African American       | 1809            | 1350            | 481             | 2529            | 1495            | 807             | .               | 8471  |
|                             | Hispanic               | 778             | 1877            | 280             | .               | .               | .               | .               | 2935  |
|                             | Asian/Pacific Islander | 425             | .               | 555             | .               | .               | .               | .               | 980   |
|                             | American Indian        | .               | .               | .               | .               | .               | .               | 3129            | 3129  |
|                             | Overall                | 9901            | 7228            | 1593            | 11303           | 3249            | 4070            | 3129            | 40473 |
| CRP (mg/dL)<br>Median (IQR) | European American      | 2.9 (1.2 - 4.3) | 2.3 (0.9 - 4.9) | 1.0 (0.4 - 2.2) | 2.3 (1.0 - 5.0) | 1.0 (0.5 - 2.6) | 1.7 (0.9 - 3.0) | .               |       |
|                             | African American       | 2.8 (0.9 - 6.7) | 2.8 (1.0 - 6.7) | 1.3 (0.5 - 3.2) | 3.6 (1.4 - 7.7) | 2.0 (0.7 - 5.2) | 2.5 (1.3 - 5.7) | .               |       |
|                             | Hispanic               | 3.1 (1.5 - 6.0) | 2.5 (1.0 - 5.4) | 1.2 (0.5 - 2.5) | .               | .               | .               | .               |       |
|                             | Asian/Pacific Islander | 1.0 (0.5 - 2.1) | .               | 0.5 (0.2 - 1.0) | .               | .               | .               | .               |       |
|                             | American Indian        | .               | .               | .               | .               | .               | .               | 3.9 (1.9 - 8.3) |       |
|                             | Overall                | 2.9 (1.3 - 6.0) | 2.5 (1.0 - 5.4) | 0.8 (0.3 - 2.1) | 2.5 (1.1 - 5.5) | 1.4 (0.6 - 3.8) | 1.8 (0.9 - 3.3) | 3.9 (1.9 - 8.3) |       |
| Age (years)<br>Mean (SD)    | European American      | 67.3 (6.9)      | 52.4 (19.5)     | 59.8 (8.2)      | 63.1 (5.6)      | 40.7 (3.4)      | 72.3 (5.4)      | .               |       |
|                             | African American       | 62.0 (7.2)      | 47.5 (17.3)     | 62.9 (7.4)      | 61.8 (5.7)      | 39.6 (3.8)      | 72.9 (5.6)      | .               |       |
|                             | Hispanic               | 61.0 (7.0)      | 45.8 (17.7)     | 61.5 (6.7)      | .               | .               | .               | .               |       |
|                             | Asian/Pacific Islander | 65.6 (7.4)      | .               | 59.8 (8.5)      | .               | .               | .               | .               |       |
|                             | American Indian        | .               | .               | .               | .               | .               | .               | 39.3 (16.4)     |       |
|                             | Overall                | 65.7 (7.4)      | 49.8 (18.9)     | 61.0 (7.9)      | 62.8 (5.7)      | 40.2 (3.6)      | 72.4 (5.4)      | 39.3 (16.4)     |       |
| Female<br>%                 | European American      | 100.0%          | 51.1%           | 36.6%           | 53.5%           | 53.0%           | 60.1%           | .               |       |
|                             | African American       | 100.0%          | 52.4%           | 19.8%           | 64.1%           | 58.3%           | 62.60%          | .               |       |
|                             | Hispanic               | 100.0%          | 51.7%           | 30.4%           | .               | .               | .               | .               |       |
|                             | Asian/Pacific Islander | 100.0%          | .               | 42.5%           | .               | .               | .               | .               |       |
|                             | American Indian        | .               | .               | .               | .               | .               | .               | 61.5%           |       |

|                                    |                        |              |              |              |              |              |              |             |
|------------------------------------|------------------------|--------------|--------------|--------------|--------------|--------------|--------------|-------------|
|                                    | Overall                | 100.0%       | 51.5%        | 32.5%        | 55.9%        | 55.4%        | 61.1%        | 61.5%       |
| BMI (SD)<br>kg/m <sup>2</sup>      | European American      | 28.4 (6.4)   | 27.8 (5.9)   | 26.5 (5.2)   | 28.3 (5.3)   | 27.1 (5.5)   | 26.3 (4.4)   | .           |
|                                    | African American       | 32.0 (7.5)   | 29.7 (7.3)   | 27.8 (4.9)   | 30.6 (6.4)   | 30.5 (7.0)   | 28.5 (5.5)   | .           |
|                                    | Hispanic               | 29.2 (6.4)   | 28.6 (5.6)   | 27.6 (4.2)   | .            | .            | .            | .           |
|                                    | Asian/Pacific Islander | 24.8 (4.4)   | .            | 25.4 (4.1)   | .            | .            | .            | .           |
|                                    | American Indian        | .            | .            | .            | .            | .            | .            | 32.35 (7.9) |
|                                    | Overall                | 29.0 (6.7)   | 28.4 (6.2)   | 26.7 (4.7)   | 28.8 (5.6)   | 28.7 (6.5)   | 26.7 (4.7)   | 32.35 (7.9) |
| Smoking<br>% Current /<br>% Former | European American      | 7.5 / 42.6%  | 25.8 / 28.9% | 8.7 / 52.7%  | 14.1 / 45.8% | 16.1 / 23.4% | 11.3 / 40.9% | .           |
|                                    | African American       | 10.0 / 39.4% | 34.6 / 15.7% | 24.2 / 44.9% | 17.6 / 35.0% | 28.3 / 11.7% | 16.0 / 35.2% | .           |
|                                    | Hispanic               | 5.5 / 28.0%  | 20.5 / 23.5% | 15.2 / 44.0% | .            | .            | .            | .           |
|                                    | Asian/Pacific Islander | 3.3 / 25.2%  | .            | 10.5 / 43.3% | .            | .            | .            | .           |
|                                    | American Indian        | .            | .            | .            | .            | .            | .            | 34 / 23.3%  |
|                                    | Overall                | 7.6 / 40.1%  | 26.1 / 25.0% | 15.1 / 45.6% | 14.8 / 43.4% | 21.7 / 18.0% | 12.2 / 39.7% | 34 / 23.3%  |
| HRT<br>% Current /<br>% Former     | European American      | 34.2 / 17.8% | 31.9% *      | 37.3 / 33.3% | 29.5 / † %   | ‡            | 28.9 / 13.1% | .           |
|                                    | African American       | 25.3 / 14.0% | 15.3% *      | 14.0 / 36.6% | 17.3 / † %   | ‡            | 17.2 / 7.3%  | .           |
|                                    | Hispanic               | 39.1 / 12.0% | 16.1% *      | 28.2 / 25.9% | .            | .            | .            | .           |
|                                    | Asian/Pacific Islander | 48.9 / 14.1% | .            | 31.5 / 31.1% | .            | .            | .            | .           |
|                                    | American Indian        | .            | .            | .            | .            | .            | .            | 9.8 / 11.4% |
|                                    | Overall                | 33.7 / 16.5% | 24.6% *      | 28.9 / 31.7% | 26.4 / † %   | ‡            | 16.2 / 7.3%  | 9.8 / 11.4% |

\* EAGLE did not have a way of identifying former hormone therapy usage

† ARIC does not have reliable information for former HRT use

‡ CARDIA participants were in their 30's and 40's at time of CRP measurement, so no HRT information is available

**Supplemental Table 3** – SNPs evaluated for an association with C-reactive protein. Previous trait association refers to the trait for which the association was originally found associated, as of the literature in 2008. For each study, 1 indicates that the SNP was genotyped and included in this analysis.

| SNP       | Gene       | Coded allele | Previous trait association | # Studies | ARIC | CARDIA | CHS | EAGLE | MEC | SHS | WHI |
|-----------|------------|--------------|----------------------------|-----------|------|--------|-----|-------|-----|-----|-----|
| rs1049092 | ARMS2/LCT  |              | Age-related macular        | 1         | .    | .      | .   | 1     | .   | .   | .   |
| rs1061170 | CFH        | C            | Age-related macular        | 1         | .    | .      | .   | 1     | .   | .   | .   |
| rs1049876 |            | C            | Body mass index            | 1         | .    | .      | .   | 1     | .   | .   | .   |
| rs1091346 | SEC16B/R/C |              | Body mass index            | 1         | .    | .      | .   | .     | 1   | .   | .   |
| rs1121980 | FTO        | A            | Body mass index            | 1         | .    | .      | .   | .     | 1   | .   | .   |
| rs1297013 | MC4R       | A            | Body mass index            | 3         | .    | .      | 1   | 1     | .   | .   | .   |
| rs1333026 | 13q21.32   | A            | Body Mass Index            | 3         | .    | .      | 1   | .     | .   | .   | 1   |
| rs1778231 | MCR4       | C            | Body Mass Index            | 6         | 1    | .      | 1   | 1     | 1   | .   | 1   |
| rs29941   | CHST8,     | A            | Body mass index            | 1         | .    | .      | .   | .     | 1   | .   | .   |
| rs6013029 |            | T            | Body Mass Index            | 2         | .    | .      | .   | 1     | .   | .   | 1   |
| rs6265    | LGR4/LIN7  | T            | Body mass index            | 2         | .    | .      | .   | 1     | 1   | .   | .   |
| rs6548238 | TMEM18     | T            | Body mass index            | 4         | .    | .      | 1   | 1     | .   | .   | 1   |
| rs6602024 | PFKP       | A            | Body mass index            | 1         | .    | .      | .   | 1     | .   | .   | .   |
| rs925946  | LGR4/LIN7  | T            | Body mass index            | 1         | .    | .      | .   | .     | 1   | .   | .   |
| rs1083873 | MTCH2      | G            | Body Mass Index            | 5         | .    | .      | 1   | 1     | 1   | .   | 1   |
| rs1093839 | GNPDA2     | G            | Body Mass Index            | 3         | .    | .      | .   | 1     | 1   | .   | 1   |
| rs1108475 | KCTD15     | A            | Body Mass Index            | 5         | .    | .      | 1   | 1     | 1   | .   | 1   |
| rs2815752 | NEGR1      | G            | Body Mass Index            | 5         | .    | .      | 1   | 1     | 1   | .   | 1   |
| rs3751812 | FTO        | T            | Body Mass Index            | 4         | .    | .      | 1   | .     | 1   | .   | 1   |
| rs7498665 | SH2B1      | G            | Body Mass Index            | 5         | .    | .      | 1   | 1     | 1   | .   | 1   |
| rs7566605 | INSIG2     | C            | Body Mass Index            | 1         | .    | .      | .   | 1     | .   | .   | .   |
| rs9939609 | FTO        | A            | Body Mass Index            | 3         | .    | .      | 1   | .     | 1   | .   | .   |
| rs7138803 | BCDIN3D/   | A            | Body mass index, W         | 1         | .    | .      | .   | .     | 1   | .   | .   |
| rs1038304 | ESR1       | G            | Bone mineral densit        | 1         | .    | .      | .   | 1     | .   | .   | .   |
| rs1107748 | SOST       | C            | Bone mineral densit        | 1         | .    | .      | .   | 1     | .   | .   | .   |
| rs1513670 |            | T            | Bone mineral densit        | 1         | .    | .      | .   | 1     | .   | .   | .   |
| rs1999805 | ESR1       | G            | Bone mineral densit        | 1         | .    | .      | .   | 1     | .   | .   | .   |
| rs3018362 | TNFRSF11   | A            | Bone mineral densit        | 1         | .    | .      | .   | 1     | .   | .   | .   |
| rs3130340 | MHC        | C            | Bone mineral densit        | 1         | .    | .      | .   | 1     | .   | .   | .   |
| rs3736228 | LRP5       | T            | Bone mineral densit        | 1         | .    | .      | .   | 1     | .   | .   | .   |
| rs3771362 | PLCL1      | T            | Bone mineral densit        | 1         | .    | .      | .   | 1     | .   | .   | .   |
| rs4355801 | TNFRSF11   | G            | Bone mineral densit        | 1         | .    | .      | .   | 1     | .   | .   | .   |
| rs4870044 | ESR1       | T            | Bone mineral densit        | 1         | .    | .      | .   | 1     | .   | .   | .   |
| rs6469804 | OPG        | G            | Bone mineral densit        | 1         | .    | .      | .   | 1     | .   | .   | .   |
| rs6929137 | ESR1       | A            | Bone mineral densit        | 1         | .    | .      | .   | 1     | .   | .   | .   |
| rs6993813 | OPG        | C            | Bone mineral densit        | 1         | .    | .      | .   | 1     | .   | .   | .   |
| rs7220711 | SOST       | G            | Bone mineral densit        | 1         | .    | .      | .   | 1     | .   | .   | .   |
| rs7524102 |            | G            | Bone mineral densit        | 1         | .    | .      | .   | 1     | .   | .   | .   |
| rs7595412 | PLCL1      | G            | Bone mineral densit        | 1         | .    | .      | .   | 1     | .   | .   | .   |
| rs9479055 | ESR1       | C            | Bone mineral densit        | 1         | .    | .      | .   | 1     | .   | .   | .   |
| rs9594738 | RANKL      | T            | Bone mineral densit        | 1         | .    | .      | .   | 1     | .   | .   | .   |
| rs9594759 | RANKL      | T            | Bone mineral densit        | 1         | .    | .      | .   | 1     | .   | .   | .   |
| rs2981582 | FGFR2      | A            | Breast Cancer              | 1         | .    | .      | .   | .     | .   | .   | 1   |
| rs429358  | APOE       | C            | Cardiovascular Disea       | 2         | .    | .      | .   | .     | 1   | .   | 1   |
| rs499818  | Chr6       | A            | Cardiovascular Disea       | 3         | .    | .      | 1   | .     | .   | .   | 1   |
| rs6857    | PVRL2      | T            | Cardiovascular Disea       | 1         | .    | .      | .   | 1     | .   | .   | .   |
| rs7412    | APOE       | T            | Cardiovascular Disea       | 2         | .    | .      | .   | .     | 1   | .   | 1   |
| rs1333049 | CDKN2A/C   |              | Coronary Artery Dise       | 4         | .    | .      | 1   | 1     | .   | .   | 1   |
| rs1722821 | SMAD3      | C            | Coronary Artery Dise       | 2         | .    | .      | .   | 1     | .   | .   | 1   |
| rs1746563 | MIA3       | A            | Coronary Artery Dise       | 1         | .    | .      | .   | .     | .   | .   | 1   |

| SNP       | Gene       | Coded allele | Previous trait association | # Studies | ARIC | CARDIA | CHS | EAGLE | MEC | SHS | WHI |
|-----------|------------|--------------|----------------------------|-----------|------|--------|-----|-------|-----|-----|-----|
| rs1767213 | FMN2       | C            | Coronary Artery Disease    | 2         | 1    | .      | .   | 1     | .   | .   | .   |
| rs2943634 | 2q36.3     | A            | Coronary Artery Disease    | 1         | .    | .      | .   | .     | .   | .   | 1   |
| rs501120  | CXCL12     | C            | Coronary Artery Disease    | 1         | .    | .      | .   | .     | .   | .   | 1   |
| rs599839  | CELSR2/PSG | G            | Coronary Artery Disease    | 6         | 1    | .      | 1   | 1     | 1   | .   | 1   |
| rs6922269 | MTHFD1L    | A            | Coronary Artery Disease    | 1         | .    | .      | .   | .     | .   | .   | 1   |
| rs8055236 | CDH13      | T            | Coronary Artery Disease    | 3         | .    | .      | 1   | 1     | .   | .   | .   |
| rs2144300 | GALNT2     | C            | Coronary Heart Disease     | 5         | .    | .      | 1   | 1     | 1   | .   | 1   |
| rs2383206 | 9p21       | A            | Coronary Heart Disease     | 2         | .    | .      | .   | 1     | .   | .   | 1   |
| rs2549513 | Chr16      | C            | Coronary Heart Disease     | 3         | .    | .      | 1   | .     | .   | .   | 1   |
| rs268     | LPL        | G            | Coronary Heart Disease     | 1         | .    | .      | .   | .     | .   | .   | 1   |
| rs1077821 | 12q23      | T            | C-reactive Protein         | 2         | 1    | .      | .   | 1     | .   | .   | .   |
| rs1205    | CRP        | T            | C-reactive Protein         | 2         | 1    | .      | .   | 1     | .   | .   | .   |
| rs1417938 | CRP        | A            | C-reactive Protein         | 1         | .    | .      | .   | 1     | .   | .   | .   |
| rs1554606 | IL6        | G            | C-reactive Protein         | 2         | 1    | .      | .   | 1     | .   | .   | .   |
| rs1800795 | IL6        | G            | C-reactive Protein         | 1         | .    | .      | .   | 1     | .   | .   | .   |
| rs1800947 | CRP        | G            | C-reactive Protein         | 2         | 1    | .      | .   | 1     | .   | .   | .   |
| rs1892534 | LEPR       | T            | C-reactive Protein         | 2         | 1    | .      | .   | 1     | .   | .   | .   |
| rs2228145 | IL6R       | C            | C-reactive Protein         | 5         | 1    | 1      | 1   | 1     | .   | .   | .   |
| rs3093058 | CRP        | T            | C-reactive Protein         | 2         | 1    | .      | .   | 1     | .   | .   | .   |
| rs4131568 | CRP        | T            | C-reactive Protein         | 2         | 1    | .      | .   | 1     | .   | .   | .   |
| rs7310409 | HNF1A      | A            | C-reactive Protein         | 1         | .    | .      | .   | 1     | .   | .   | .   |
| rs780094  | GCKR       | T            | C-reactive Protein         | 6         | 1    | 1      | 1   | 1     | 1   | .   | .   |
| rs1024405 |            | G            | Glucose                    | 1         | .    | .      | .   | 1     | .   | .   | .   |
| rs1736674 | ADIPOQ     | C            | Glucose                    | 1         | .    | .      | .   | 1     | .   | .   | .   |
| rs560887  | G6PC2      | T            | Glucose                    | 1         | .    | .      | .   | 1     | .   | .   | .   |
| rs563694  | G6PC2      | C            | Glucose                    | 1         | .    | .      | .   | 1     | .   | .   | .   |
| rs1088512 | ADRA2A     | T            | Glucose/HOMA-B             | 1         | .    | .      | .   | .     | 1   | .   | .   |
| rs1155847 | SLC30A8    | G            | Glucose/HOMA-B             | 1         | .    | .      | .   | .     | 1   | .   | .   |
| rs1160592 | CRY2       | C            | Glucose/HOMA-B             | 1         | .    | .      | .   | .     | 1   | .   | .   |
| rs174550  | FADS1      | C            | Glucose/HOMA-B             | 1         | .    | .      | .   | .     | 1   | .   | .   |
| rs4506565 | TCF7L2     | T            | Glucose/HOMA-B             | 1         | .    | .      | .   | .     | 1   | .   | .   |
| rs7034200 | GLIS3      | C            | Glucose/HOMA-B             | 1         | .    | .      | .   | .     | 1   | .   | .   |
| rs7944584 | MADD       | T            | Glucose/HOMA-B             | 1         | .    | .      | .   | .     | 1   | .   | .   |
| rs2877716 | ADCY5      | T            | Glucose/OGTT/T2D           | 1         | .    | .      | .   | .     | 1   | .   | .   |
| rs1689097 | SLC2A9     | T            | Gout                       | 1         | .    | .      | 1   | .     | .   | .   | .   |
| rs2231142 | ABCG2      | T            | Gout                       | 3         | .    | .      | 1   | 1     | .   | .   | .   |
| rs1046801 | LIPC       | T            | HDL Cholesterol            | 1         | .    | .      | .   | 1     | .   | .   | .   |
| rs1050366 | LPL        | A            | HDL Cholesterol            | 1         | .    | .      | .   | 1     | .   | .   | .   |
| rs1259677 | CETP       | G            | HDL Cholesterol            | 2         | .    | .      | .   | 1     | 1   | .   | .   |
| rs1267891 | LPL        | G            | HDL Cholesterol            | 1         | .    | .      | .   | 1     | .   | .   | .   |
| rs1323432 | GRIN3A     | G            | HDL Cholesterol            | 1         | .    | .      | .   | 1     | .   | .   | .   |
| rs1566439 | CETP       | C            | HDL Cholesterol            | 4         | .    | .      | 1   | 1     | 1   | .   | .   |
| rs173539  | CETP       | T            | HDL Cholesterol            | 1         | .    | .      | .   | 1     | .   | .   | .   |
| rs174547  | FADS1      | C            | HDL Cholesterol            | 3         | .    | .      | .   | 1     | 1   | .   | 1   |
| rs1800588 | LIPC       | T            | HDL Cholesterol            | 1         | .    | .      | .   | 1     | .   | .   | .   |
| rs1800777 | CETP       | A            | HDL Cholesterol            | 1         | .    | .      | .   | 1     | .   | .   | .   |
| rs1800961 | HNF4A      | T            | HDL Cholesterol            | 6         | 1    | 1      | 1   | 1     | 1   | .   | .   |
| rs1864163 | CETP       | A            | HDL Cholesterol            | 3         | 1    | .      | .   | 1     | 1   | .   | .   |
| rs1883025 | ABCA1      | T            | HDL Cholesterol            | 2         | .    | .      | .   | 1     | 1   | .   | .   |
| rs2083637 | LPL        | G            | HDL Cholesterol            | 3         | .    | .      | 1   | 1     | .   | .   | .   |
| rs2156552 | LIPG       | A            | HDL Cholesterol            | 5         | .    | .      | 1   | 1     | 1   | .   | 1   |
| rs2197089 | LPL        | G            | HDL Cholesterol            | 5         | .    | .      | 1   | 1     | 1   | .   | 1   |
| rs2217332 | HERPUD1    | A            | HDL Cholesterol            | 3         | .    | .      | 1   | 1     | .   | .   | .   |
| rs2271293 | LCAT       | A            | HDL Cholesterol            | 3         | .    | .      | 1   | .     | .   | .   | 1   |

| SNP       | Gene      | Coded allele | Previous trait associated | # Studies | ARIC | CARDIA | CHS | EAGLE | MEC | SHS | WHI |
|-----------|-----------|--------------|---------------------------|-----------|------|--------|-----|-------|-----|-----|-----|
| rs2338104 | MMAB/M    | C            | HDL Cholesterol           | 4         | .    | .      | 1   | 1     | 1   | .   | .   |
| rs255049  | LCAT      | C            | HDL Cholesterol           | 1         | .    | .      | .   | 1     | .   | .   | .   |
| rs261332  | LIPC      | A            | HDL Cholesterol           | 2         | .    | .      | .   | 1     | 1   | .   | .   |
| rs2892768 | APOA1/C3  | G            | HDL Cholesterol           | 6         | 1    | 1      | 1   | 1     | .   | .   | 1   |
| rs2967605 | ANGPTL4   | T            | HDL Cholesterol           | 3         | .    | .      | 1   | 1     | .   | .   | .   |
| rs3135506 | APOA1/C3  | C            | HDL Cholesterol           | 3         | .    | .      | 1   | 1     | .   | .   | .   |
| rs328     | LPL       | G            | HDL Cholesterol           | 5         | .    | .      | 1   | 1     | 1   | .   | 1   |
| rs3764261 | CETP      | A            | HDL Cholesterol           | 5         | .    | .      | 1   | 1     | 1   | .   | 1   |
| rs3890182 | ABCA1     | A            | HDL Cholesterol           | 5         | .    | .      | 1   | 1     | 1   | .   | 1   |
| rs3905000 | ABCA1     | A            | HDL Cholesterol           | 3         | .    | .      | 1   | 1     | .   | .   | .   |
| rs4149268 | ABCA1     | T            | HDL Cholesterol           | 3         | .    | .      | .   | 1     | 1   | .   | 1   |
| rs4149274 | ABCA1     | A            | HDL Cholesterol           | 1         | .    | .      | .   | 1     | .   | .   | .   |
| rs471364  | TTC39B    | C            | HDL Cholesterol           | 4         | .    | .      | 1   | 1     | 1   | .   | .   |
| rs4939883 | LIPG      | T            | HDL Cholesterol           | 3         | .    | .      | 1   | 1     | .   | .   | .   |
| rs6586891 | LPL       | C            | HDL Cholesterol           | 5         | .    | .      | 1   | 1     | 1   | .   | 1   |
| rs6754295 | APOB      | G            | HDL Cholesterol           | 2         | .    | .      | 1   | .     | .   | .   | .   |
| rs711752  | CETP      | A            | HDL Cholesterol           | 1         | .    | .      | .   | 1     | .   | .   | .   |
| rs7120118 | NR1H3     | C            | HDL Cholesterol           | 3         | .    | .      | 1   | 1     | .   | .   | .   |
| rs7205804 | CETP      | A            | HDL Cholesterol           | 1         | .    | .      | .   | .     | .   | .   | 1   |
| rs7395662 | MADD-FO   | A            | HDL Cholesterol           | 3         | .    | .      | 1   | 1     | .   | .   | .   |
| rs7679    | PLTP      | C            | HDL Cholesterol           | 1         | .    | .      | .   | 1     | .   | .   | .   |
| rs9282541 | ABCA1     | T            | HDL Cholesterol           | 1         | .    | .      | .   | 1     | .   | .   | .   |
| rs964184  | APOA1     | G            | HDL Cholesterol           | 4         | 1    | .      | .   | 1     | 1   | .   | 1   |
| rs9891572 |           | T            | HDL Cholesterol           | 3         | .    | .      | 1   | 1     | .   | .   | .   |
| rs9989419 | CETP      | A            | HDL Cholesterol           | 5         | .    | .      | 1   | 1     | 1   | .   | 1   |
| rs2494250 | MCP/1     | G            | Inflammation              | 1         | .    | .      | .   | .     | .   | .   | 1   |
| rs4128725 | MCP/1     | C            | Inflammation              | 1         | .    | .      | .   | .     | .   | .   | 1   |
| rs6732914 | GCG       | C            | Inflammation              | 1         | .    | .      | .   | .     | .   | .   | 1   |
| rs1118579 | PANK1     | A            | Insulin                   | 1         | .    | .      | .   | 1     | .   | .   | .   |
| rs35767   | IGF1      | T            | insulin/HOMA-IR/IG        | 1         | .    | .      | .   | .     | 1   | .   | .   |
| rs1048677 |           | A            | Ischemic stroke           | 3         | .    | .      | 1   | .     | .   | .   | 1   |
| rs1799963 | Prothromb | A            | Ischemic stroke           | 1         | .    | .      | .   | .     | .   | .   | 1   |
| rs1801133 | MTHFR/C6  | A            | Ischemic stroke           | 3         | .    | .      | 1   | .     | .   | .   | 1   |
| rs6025    | F5        | T            | Ischemic stroke           | 2         | 1    | .      | .   | .     | .   | .   | 1   |
| rs7506045 | IMPA2     | T            | Ischemic stroke           | 3         | .    | .      | 1   | .     | .   | .   | 1   |
| rs783396  | AIM1      | A            | Ischemic stroke           | 3         | .    | .      | 1   | .     | .   | .   | 1   |
| rs9536591 |           | C            | Ischemic stroke           | 3         | .    | .      | 1   | .     | .   | .   | 1   |
| rs4821480 | MHY9      | G            | Kidney disease            | 3         | .    | .      | 1   | 1     | .   | .   | .   |
| rs102275  | FADS1-FA  | C            | LDL Cholesterol           | 3         | .    | .      | 1   | 1     | .   | .   | .   |
| rs1040196 | NCAN      | C            | LDL Cholesterol           | 2         | .    | .      | .   | 1     | 1   | .   | .   |
| rs1040227 | APOE/C1   | G            | LDL Cholesterol           | 4         | .    | .      | 1   | 1     | 1   | .   | .   |
| rs1120651 | PCSK9     | C            | LDL Cholesterol           | 4         | .    | .      | 1   | 1     | .   | .   | 1   |
| rs1159114 | PCSK9     | T            | LDL Cholesterol           | 6         | 1    | .      | 1   | 1     | 1   | .   | 1   |
| rs1265426 | HMGCR     | T            | LDL Cholesterol           | 5         | .    | .      | 1   | 1     | 1   | .   | 1   |
| rs1269538 | B4GALT4   | G            | LDL Cholesterol           | 2         | .    | .      | .   | 1     | 1   | .   | .   |
| rs1274037 | CELSR2    | T            | LDL Cholesterol           | 1         | .    | .      | .   | 1     | .   | .   | .   |
| rs1501908 | TIMD4     | G            | LDL Cholesterol           | 2         | .    | .      | .   | 1     | 1   | .   | .   |
| rs1529729 | LDLR      | C            | LDL Cholesterol           | 3         | .    | .      | 1   | 1     | .   | .   | .   |
| rs1535    | FADS1-FA  | G            | LDL Cholesterol           | 3         | .    | .      | 1   | 1     | .   | .   | .   |
| rs1699614 | CILP2/PBX | T            | LDL Cholesterol           | 5         | .    | .      | 1   | 1     | 1   | .   | 1   |
| rs174537  | FADS1-FA  | T            | LDL Cholesterol           | 3         | .    | .      | 1   | 1     | .   | .   | .   |
| rs174570  | FADS2/3   | T            | LDL Cholesterol           | 4         | .    | .      | 1   | 1     | 1   | .   | .   |
| rs2075650 | TOMM40    | G            | LDL Cholesterol           | 5         | 1    | .      | 1   | 1     | 1   | .   | .   |
| rs2228671 | LDLR      | T            | LDL Cholesterol           | 5         | 1    | .      | 1   | 1     | 1   | .   | .   |
| rs2650000 | HNFB1A    | A            | LDL Cholesterol           | 6         | 1    | 1      | 1   | 1     | 1   | .   | .   |
| rs3846662 | HMGCR     | G            | LDL Cholesterol           | 3         | .    | .      | 1   | 1     | .   | .   | .   |

| SNP       | Gene       | Coded allele | Previous trait associated    | # Studies | ARIC | CARDIA | CHS | EAGLE | MEC | SHS | WHI |
|-----------|------------|--------------|------------------------------|-----------|------|--------|-----|-------|-----|-----|-----|
| rs3846663 | HMGCR      | T            | LDL Cholesterol              | 1         | .    | .      | .   | 1     | .   | .   | .   |
| rs4420638 | APOE/C1/G  | G            | LDL Cholesterol              | 5         | 1    | .      | 1   | 1     | .   | .   | 1   |
| rs4591370 | APOB       | A            | LDL Cholesterol              | 1         | .    | .      | .   | 1     | .   | .   | .   |
| rs4605275 | BCAM       | T            | LDL Cholesterol              | 2         | .    | .      | 1   | .     | .   | .   | .   |
| rs4803750 | BCL3       | G            | LDL Cholesterol              | 4         | .    | .      | 1   | 1     | 1   | .   | .   |
| rs488507  | APOB       | G            | LDL Cholesterol              | 1         | .    | .      | .   | 1     | .   | .   | .   |
| rs4970834 | CELSR2/PST | T            | LDL Cholesterol              | 1         | .    | .      | .   | 1     | .   | .   | .   |
| rs515135  | APOB       | T            | LDL Cholesterol              | 1         | .    | .      | .   | 1     | .   | .   | .   |
| rs562338  | APOB       | A            | LDL Cholesterol              | 5         | .    | .      | 1   | 1     | 1   | .   | 1   |
| rs602633  | CELSR2/PST | T            | LDL Cholesterol              | 1         | .    | .      | .   | 1     | .   | .   | .   |
| rs6102059 | MAFB       | T            | LDL Cholesterol              | 2         | .    | .      | .   | 1     | 1   | .   | .   |
| rs646776  | CELSR2/PST | C            | LDL Cholesterol              | 6         | 1    | .      | 1   | 1     | 1   | .   | 1   |
| rs6511720 | LDLR       | T            | LDL Cholesterol              | 7         | 1    | 1      | 1   | 1     | 1   | .   | 1   |
| rs6544713 | ABCGB      | T            | LDL Cholesterol              | 3         | .    | .      | .   | 1     | 1   | .   | 1   |
| rs6756629 | ABCG5      | A            | LDL Cholesterol              | 3         | .    | .      | 1   | 1     | .   | .   | .   |
| rs693     | APOB       | A            | LDL Cholesterol              | 6         | .    | 1      | 1   | 1     | 1   | .   | 1   |
| rs754523  | APOB       | G            | LDL Cholesterol              | 4         | .    | .      | 1   | 1     | .   | .   | 1   |
| rs7575840 | APOB       | T            | LDL Cholesterol              | 1         | .    | .      | .   | 1     | .   | .   | .   |
| rs1075727 | CDKN2A/C   | A            | Myocardial infarction        | 4         | .    | .      | 1   | 1     | .   | .   | 1   |
| rs2383207 | CDKN2A/C   | G            | Myocardial infarction        | 4         | .    | .      | 1   | 1     | .   | .   | 1   |
| rs2383208 | CDKN2A/C   | G            | Myocardial infarction        | 5         | .    | .      | 1   | 1     | 1   | 1   | 1   |
| rs4804611 | ZNF627     | G            | Myocardial infarction        | 1         | .    | .      | .   | .     | .   | .   | 1   |
| rs4977574 | CDKN2A, C  | A            | Myocardial infarction        | 1         | .    | .      | .   | .     | .   | .   | 1   |
| rs1106683 | 7q32.3     | A            | Obesity                      | 1         | .    | .      | .   | .     | .   | .   | 1   |
| rs8050136 | FTO        | A            | Obesity                      | 6         | 1    | .      | 1   | 1     | 1   | 1   | 1   |
| rs9930506 | FTO        | G            | Obesity                      | 2         | .    | .      | .   | .     | 1   | .   | 1   |
| rs9941349 | FTO        | T            | Obesity                      | 1         | .    | .      | .   | .     | 1   | .   | .   |
| rs1421085 | FTO        | C            | Obesity, Waist circumference | 1         | .    | .      | .   | .     | 1   | .   | .   |
| rs7935346 |            | A            | Osteoporotic fracture        | 1         | .    | .      | .   | 1     | .   | .   | .   |
| rs1242579 | NINJ2      | A            | Stroke                       | 1         | .    | .      | .   | .     | .   | .   | 1   |
| rs2200733 | PITX2/TIF1 | T            | Stroke                       | 3         | .    | .      | 1   | .     | .   | .   | 1   |
| rs2304130 | NCAN       | G            | Total cholesterol            | 3         | .    | .      | 1   | 1     | .   | .   | .   |
| rs6987702 | TRIB1      | C            | Total cholesterol            | 3         | .    | .      | 1   | 1     | .   | .   | .   |
| rs1009663 | LPL        | T            | Triglycerides                | 2         | .    | .      | 1   | .     | .   | .   | .   |
| rs1088935 | ANGPTL3    | C            | Triglycerides                | 4         | .    | .      | 1   | 1     | 1   | .   | .   |
| rs1112712 | RBKS/GCK   | G            | Triglycerides                | 1         | .    | .      | .   | 1     | .   | .   | .   |
| rs1213033 | ANGPTL3    | T            | Triglycerides                | 3         | .    | .      | 1   | 1     | .   | .   | .   |
| rs1214069 | LOC40079   | T            | Triglycerides                | 1         | .    | .      | .   | 1     | .   | .   | .   |
| rs1227200 | APOA1/C3   | A            | Triglycerides                | 3         | .    | .      | 1   | 1     | .   | .   | .   |
| rs1228603 | APOA5/A4   | T            | Triglycerides                | 2         | 1    | .      | .   | 1     | .   | .   | .   |
| rs1260326 | GCKR       | T            | Triglycerides                | 6         | 1    | .      | 1   | 1     | 1   | .   | 1   |
| rs1471233 |            | T            | Triglycerides                | 2         | .    | .      | .   | 1     | 1   | .   | .   |
| rs1558861 | APOA1/C3   | C            | Triglycerides                | 1         | .    | .      | .   | 1     | .   | .   | .   |
| rs1714573 | MLXIPL     | T            | Triglycerides                | 5         | .    | .      | 1   | 1     | 1   | .   | 1   |
| rs1721652 | NCAN       | T            | Triglycerides                | 1         | .    | .      | .   | 1     | .   | .   | .   |
| rs1732151 | TRIB1      | G            | Triglycerides                | 1         | .    | .      | .   | 1     | .   | .   | .   |
| rs1741091 | LPL        | A            | Triglycerides                | 1         | .    | .      | .   | 1     | .   | .   | .   |
| rs1748195 | ANGPTL3    | G            | Triglycerides                | 3         | .    | .      | .   | 1     | 1   | .   | 1   |
| rs1748275 | LPL        | T            | Triglycerides                | 1         | .    | .      | .   | 1     | .   | .   | .   |
| rs2000571 | APOA1/C3   | A            | Triglycerides                | 4         | 1    | .      | 1   | 1     | .   | .   | .   |
| rs2074755 | BAZ1B      | C            | Triglycerides                | 1         | .    | .      | .   | 1     | .   | .   | .   |
| rs2075292 | APOA1      | G            | Triglycerides                | 3         | .    | .      | 1   | 1     | .   | .   | .   |
| rs2954029 | TRIB1      | T            | Triglycerides                | 4         | 1    | .      | .   | 1     | 1   | .   | 1   |

| SNP       | Gene      | Coded allele | Previous trait association | # Studies | ARIC | CARDIA | CHS | EAGLE | MEC | SHS | WHI |
|-----------|-----------|--------------|----------------------------|-----------|------|--------|-----|-------|-----|-----|-----|
| rs4740635 |           | C            | Triglycerides              | 1         | .    | .      | .   | 1     | .   | .   | .   |
| rs4775041 | LIPC      | C            | Triglycerides              | 5         | .    | .      | 1   | 1     | 1   | .   | 1   |
| rs486394  | APOA1/C3  | C            | Triglycerides              | 1         | .    | .      | .   | 1     | .   | .   | .   |
| rs6589566 | APOA1/C3  | G            | Triglycerides              | 1         | .    | .      | .   | 1     | .   | .   | .   |
| rs673548  | APOB      | A            | Triglycerides              | 3         | .    | .      | 1   | 1     | .   | .   | .   |
| rs714052  | MLXIPL    | G            | Triglycerides              | 3         | .    | .      | 1   | 1     | .   | .   | .   |
| rs7557067 | APOB      | G            | Triglycerides              | 1         | .    | .      | .   | 1     | .   | .   | .   |
| rs7819412 | XKR6      | G            | Triglycerides              | 1         | .    | .      | .   | 1     | .   | .   | .   |
| rs7861175 |           | C            | Triglycerides              | 1         | .    | .      | .   | 1     | .   | .   | .   |
| rs1001013 | WFS1      | A            | Type 2 Diabetes            | 3         | .    | .      | 1   | .     | .   | 1   | 1   |
| rs1049772 | Chr2      | A            | Type 2 Diabetes            | 1         | .    | .      | .   | .     | .   | .   | 1   |
| rs1081166 | CDKN2A/C  | C            | Type 2 Diabetes            | 4         | .    | .      | 1   | 1     | .   | 1   | 1   |
| rs1083096 | MTNR1B    | G            | Type 2 Diabetes            | 3         | .    | .      | .   | 1     | 1   | .   | 1   |
| rs1092393 | NOTCH2    | T            | Type 2 Diabetes            | 5         | .    | .      | 1   | 1     | 1   | 1   | 1   |
| rs1094639 | CDKAL1    | C            | Type 2 Diabetes            | 2         | .    | .      | 1   | .     | .   | 1   | .   |
| rs1111875 | HHEX/IDE  | T            | Type 2 Diabetes            | 5         | .    | .      | 1   | 1     | 1   | 1   | 1   |
| rs1113132 | EXT2      | C            | Type 2 diabetes            | 1         | .    | .      | .   | 1     | .   | .   | .   |
| rs1244069 | C2CDB4    | C            | Type 2 Diabetes            | 1         | .    | .      | .   | .     | 1   | .   | .   |
| rs1251809 | LOC72901, | G            | Type 2 Diabetes            | 1         | .    | .      | .   | .     | 1   | .   | .   |
| rs1277979 | CDC123/C  | G            | Type 2 Diabetes            | 5         | .    | .      | 1   | 1     | 1   | 1   | 1   |
| rs1326663 | SLC30A8   | T            | Type 2 Diabetes            | 5         | .    | .      | 1   | 1     | 1   | 1   | 1   |
| rs1470579 | IGF2BP2   | C            | Type 2 diabetes            | 3         | .    | .      | 1   | 1     | .   | .   | .   |
| rs1801282 | PPARG     | G            | Type 2 Diabetes            | 5         | .    | .      | 1   | 1     | 1   | 1   | 1   |
| rs2074196 | KCNQ1     | T            | Type 2 Diabetes            | 1         | .    | .      | .   | .     | 1   | .   | .   |
| rs2237892 | KCNQ1     | T            | Type 2 Diabetes            | 3         | .    | .      | 1   | .     | 1   | .   | .   |
| rs2237895 | KCNQ1     | C            | Type 2 Diabetes            | 2         | .    | .      | .   | 1     | 1   | .   | .   |
| rs2237897 | KCNQ1     | T            | Type 2 Diabetes            | 2         | .    | .      | .   | 1     | 1   | .   | .   |
| rs2943641 | LOC64673, | T            | Type 2 Diabetes            | 1         | .    | .      | .   | .     | 1   | .   | .   |
| rs4402960 | IGF2BP2   | T            | Type 2 Diabetes            | 5         | .    | .      | 1   | 1     | 1   | 1   | 1   |
| rs4607103 | ADAMTS9   | T            | Type 2 Diabetes            | 5         | .    | .      | 1   | 1     | 1   | 1   | 1   |
| rs4689388 | WFS1, PPF | G            | Type 2 Diabetes            | 1         | .    | .      | .   | .     | 1   | .   | .   |
| rs4712523 | CDKAL1    | G            | Type 2 Diabetes            | 4         | .    | .      | 1   | 1     | .   | .   | 1   |
| rs4760920 | TSPAN8    | C            | Type 2 Diabetes            | 3         | .    | .      | 1   | .     | .   | .   | 1   |
| rs5215    | KCNJ11    | C            | Type 2 Diabetes            | 4         | 1    | .      | 1   | .     | .   | 1   | 1   |
| rs5219    | KCNJ11    | T            | Type 2 Diabetes            | 4         | .    | .      | 1   | 1     | .   | 1   | 1   |
| rs564398  | CDKN2A/C  | C            | Type 2 Diabetes            | 1         | .    | .      | .   | .     | .   | .   | 1   |
| rs7480010 | LOC38776, | G            | Type 2 diabetes            | 3         | .    | .      | 1   | 1     | .   | .   | .   |
| rs7578597 | THADA     | C            | Type 2 Diabetes            | 4         | .    | .      | 1   | 1     | .   | 1   | 1   |
| rs7754840 | CDKAL1    | C            | Type 2 Diabetes            | 2         | .    | .      | .   | 1     | 1   | .   | .   |
| rs7901695 | TCF7L2    | C            | Type 2 Diabetes            | 4         | .    | .      | 1   | 1     | .   | 1   | 1   |
| rs7903146 | TCF7L2    | T            | Type 2 Diabetes            | 5         | .    | .      | 1   | 1     | 1   | 1   | 1   |
| rs7923837 | HHEX      | A            | Type 2 diabetes            | 3         | .    | .      | 1   | 1     | .   | .   | .   |
| rs7961581 | TSPAN8/L  | C            | Type 2 Diabetes            | 4         | .    | .      | 1   | 1     | 1   | 1   | .   |
| rs864745  | JAZF1     | C            | Type 2 Diabetes            | 5         | .    | .      | 1   | 1     | 1   | 1   | 1   |
| rs1170806 | ADCY5     | G            | Type 2 Diabetes; Glu       | 1         | .    | .      | .   | .     | 1   | .   | .   |
| rs2191349 | DGKB-TM   | T            | Type 2 Diabetes; Glu       | 1         | .    | .      | .   | .     | 1   | .   | .   |
| rs340874  | PROX1     | A            | Type 2 Diabetes; Glu       | 1         | .    | .      | .   | .     | 1   | .   | .   |
| rs6855911 | GLUT9     | G            | Uric acid                  | 1         | .    | .      | .   | 1     | .   | .   | .   |
| rs7442295 | SLC2A9    | G            | Uric acid                  | 1         | .    | .      | .   | 1     | .   | .   | .   |
| rs1014699 | NRXN3     | G            | Waist circumference        | 1         | .    | .      | .   | .     | 1   | .   | .   |
| rs545854  | MSRA      | C            | Waist circumference        | 1         | .    | .      | .   | .     | 1   | .   | .   |
| rs987237  | TFAP2B    | G            | Waist circumference        | 1         | .    | .      | .   | .     | 1   | .   | .   |
| rs2605100 | LYPLAL1   | A            | Waist/hip in women         | 1         | .    | .      | .   | .     | 1   | .   | .   |
|           |           |              |                            | Total     | 30   | 7      | 113 | 196   | 103 | 19  | 94  |



**Supplemental Table 4** – Number of participants available for SNP analyses across studies for each race/ethnicity group. A \* indicates that results were excluded due to <100 participants.

| SNP        | European American | African American | Hispanic | Asian/Pacific Islander | American Indian | OVERALL |
|------------|-------------------|------------------|----------|------------------------|-----------------|---------|
| rs10010131 | 6820              | 2597             | 777      | 422                    | 3129            | 13745   |
| rs10096633 | 3244              | 590              | .        | .                      | .               | 3834    |
| rs10146997 | 255               | 450              | 251      | 527                    | .               | 1483    |
| rs102275   | 7199              | 1920             | 1856     | .                      | .               | 10975   |
| rs10244051 | 3966              | 1330             | 1853     | .                      | .               | 7149    |
| rs1038304  | 3957              | 1328             | 1856     | .                      | .               | 7141    |
| rs10401969 | 4223              | 1780             | 2117     | 529                    | .               | 8649    |
| rs10402271 | 7436              | 2370             | 2100     | 527                    | .               | 12433   |
| rs10468017 | 3949              | 1333             | 1862     | .                      | .               | 7144    |
| rs10486776 | 10049             | 2386             | 776      | 422                    | *               | 13633   |
| rs10490924 | 3958              | 1328             | 1871     | .                      | .               | 7157    |
| rs10497721 | 6817              | 1799             | 777      | 422                    | *               | 9815    |
| rs10498767 | 3915              | 1322             | 1841     | .                      | .               | 7078    |
| rs10503669 | 3946              | 1320             | 1867     | .                      | .               | 7133    |
| rs1061170  | 3827              | 1280             | 1832     | .                      | .               | 6939    |
| rs10757278 | 13948             | 3923             | 2642     | 422                    | *               | 20935   |
| rs10778213 | 18056             | 5412             | 1858     | .                      | .               | 25326   |
| rs10811661 | 13961             | 3922             | 2620     | 422                    | 3129            | 24054   |
| rs10830963 | 7943              | 2996             | 2503     | 632                    | *               | 14074   |
| rs10838738 | 14279             | 4181             | 2907     | 942                    | *               | 22309   |
| rs10885122 | 258               | 454              | 257      | 527                    | .               | 1496    |
| rs10889353 | 7432              | 2375             | 2100     | 528                    | .               | 12435   |
| rs10913469 | 259               | 454              | 257      | 525                    | .               | 1495    |
| rs10923931 | 14231             | 4378             | 2891     | 951                    | 3129            | 25580   |
| rs10938397 | 10992             | 4339             | 2869     | 932                    | *               | 19132   |
| rs10946398 | 3193              | 800              | .        | .                      | 3129            | 7122    |
| rs1106683  | 6819              | 1799             | 777      | 422                    | *               | 9817    |
| rs1107748  | 3958              | 1326             | 1856     | .                      | .               | 7140    |
| rs11084753 | 14210             | 4378             | 2891     | 950                    | *               | 22429   |
| rs1111875  | 14264             | 4154             | 2876     | 949                    | 3129            | 25372   |
| rs11127129 | 3955              | 1329             | 1855     | .                      | .               | 7139    |
| rs1113132  | 3964              | 1330             | 1859     | .                      | .               | 7153    |
| rs11185790 | 3961              | 1331             | 1858     | .                      | .               | 7150    |
| rs11206510 | 13994             | 3938             | 2649     | 422                    | *               | 21003   |
| rs1121980  | 255               | 454              | 255      | 525                    | .               | 1489    |
| rs11558471 | 259               | 456              | 256      | 528                    | .               | 1499    |
| rs11591147 | 22665             | 6717             | 2874     | 943                    | *               | 33199   |
| rs11605924 | 259               | 454              | 257      | 529                    | .               | 1499    |
| rs11708067 | 259               | 454              | 255      | 527                    | .               | 1495    |
| rs1205     | 12400             | 3669             | 1842     | .                      | .               | 17911   |
| rs12130333 | 7178              | 1916             | 1859     | .                      | .               | 10953   |

| SNP        | European<br>American | African<br>American | Hispanic | Asian/Pacific<br>Islander | American<br>Indian | OVERALL |
|------------|----------------------|---------------------|----------|---------------------------|--------------------|---------|
| rs12140698 | 3962                 | 1329                | 1861     | .                         | .                  | 7152    |
| rs12272004 | 7185                 | 1914                | 1861     | .                         | .                  | 10960   |
| rs12286037 | 12408                | 3669                | 1862     | .                         | .                  | 17939   |
| rs12425791 | 4178                 | 1614                | 725      | 388                       | *                  | 6905    |
| rs12440695 | 255                  | 453                 | 255      | 527                       | .                  | 1490    |
| rs12518099 | 259                  | 452                 | 255      | 527                       | .                  | 1493    |
| rs12596776 | 4170                 | 1758                | 2096     | 526                       | .                  | 8550    |
| rs1260326  | 22661                | 6506                | 2873     | 951                       | *                  | 32991   |
| rs12654264 | 14205                | 4361                | 2870     | 943                       | *                  | 22379   |
| rs12678919 | 3966                 | 1336                | 1861     | .                         | .                  | 7163    |
| rs12695382 | 4228                 | 1789                | 2119     | 527                       | .                  | 8663    |
| rs12740374 | 3959                 | 1321                | 1860     | .                         | .                  | 7140    |
| rs12779790 | 14216                | 4378                | 2887     | 948                       | 3129               | 25558   |
| rs12970134 | 7198                 | 1914                | 1856     | .                         | .                  | 10968   |
| rs1323432  | 3941                 | 1320                | 1842     | .                         | .                  | 7103    |
| rs13266634 | 14269                | 2358                | 2886     | 523                       | 3129               | 23165   |
| rs1333026  | 10051                | 2389                | 777      | 421                       | *                  | 13638   |
| rs1333049  | 13969                | 3923                | 2635     | 422                       | *                  | 20949   |
| rs1417938  | 3943                 | 1328                | 1845     | .                         | .                  | 7116    |
| rs1421085  | 252                  | 444                 | 245      | 516                       | .                  | 1457    |
| rs1470579  | 7187                 | 1908                | 1855     | .                         | .                  | 10950   |
| rs1471233  | 4215                 | 1785                | 2116     | 525                       | .                  | 8641    |
| rs1501908  | 4205                 | 2568                | 2113     | 524                       | .                  | 9410    |
| rs1513670  | 3960                 | 1331                | 1859     | .                         | .                  | 7150    |
| rs1529729  | 7170                 | 1908                | 1838     | .                         | .                  | 10916   |
| rs1535     | 7199                 | 1922                | 1856     | .                         | .                  | 10977   |
| rs1554606  | 12292                | 3667                | 1585     | .                         | .                  | 17544   |
| rs1558861  | 3967                 | 1330                | 1860     | .                         | .                  | 7157    |
| rs1566439  | 7440                 | 2357                | 2106     | 526                       | .                  | 12429   |
| rs16890979 | .                    | 802                 | .        | .                         | .                  | 802     |
| rs16996148 | 14220                | 4375                | 2891     | 948                       | *                  | 22434   |
| rs17145738 | 14237                | 4385                | 2905     | 948                       | *                  | 22475   |
| rs17216525 | 3971                 | 1336                | 1862     | .                         | .                  | 7169    |
| rs17228212 | 10783                | 3129                | 2637     | 422                       | *                  | 16971   |
| rs17321515 | 3951                 | 1328                | 1854     | .                         | .                  | 7133    |
| rs173539   | 3652                 | 1175                | 1696     | .                         | .                  | 6523    |
| rs17366743 | 3937                 | 1321                | 1844     | .                         | .                  | 7102    |
| rs17410914 | 3966                 | 1331                | 1858     | .                         | .                  | 7155    |
| rs174537   | 7209                 | 1917                | 1853     | .                         | .                  | 10979   |

| SNP        | European | African  | Hispanic | Asian/Pacific | American |  |         |
|------------|----------|----------|----------|---------------|----------|--|---------|
|            | American | American |          | Islander      | Indian   |  | OVERALL |
| rs174547   | 11002    | 4389     | 2893     | 526           | *        |  | 18810   |
| rs174550   | 255      | 454      | 252      | 523           | .        |  | 1484    |
| rs174570   | 7453     | 2372     | 2107     | 528           | .        |  | 12460   |
| rs17465637 | 6821     | 1798     | 777      | 422           | *        |  | 9818    |
| rs1748195  | 10991    | 3577     | 2906     | 948           | *        |  | 18422   |
| rs17482753 | 3961     | 1327     | 1857     | .             | .        |  | 7145    |
| rs17672135 | 12365    | 3677     | 1856     | .             | .        |  | 17898   |
| rs17782313 | 21563    | 6504     | 2900     | 946           | *        |  | 31913   |
| rs1799963  | 6812     | 1799     | 777      | 422           | *        |  | 9810    |
| rs1800588  | 3946     | 1319     | 1842     | .             | .        |  | 7107    |
| rs1800777  | 3970     | 1330     | 1861     | .             | .        |  | 7161    |
| rs1800795  | 3940     | 1325     | 1851     | .             | .        |  | 7116    |
| rs1800947  | 12404    | 3676     | 1842     | .             | .        |  | 17922   |
| rs1800961  | 17660    | 6222     | 2117     | 523           | .        |  | 26522   |
| rs1801133  | 10050    | 2387     | 777      | 422           | *        |  | 13636   |
| rs1801282  | 14212    | 4371     | 2874     | 948           | 3129     |  | 25534   |
| rs1864163  | 12672    | 4126     | 2113     | 525           | .        |  | 19436   |
| rs1883025  | 4211     | 1769     | 2114     | 526           | .        |  | 8620    |
| rs1892534  | 11344    | 3471     | 1851     | .             | .        |  | 16666   |
| rs1999805  | 3955     | 1323     | 1857     | .             | .        |  | 7135    |
| rs2000571  | 15678    | 4271     | 1859     | .             | .        |  | 21808   |
| rs2074196  | 259      | 454      | 256      | 529           | .        |  | 1498    |
| rs2074755  | 3961     | 1331     | 1855     | .             | .        |  | 7147    |
| rs2075292  | 7205     | 1916     | 1853     | .             | .        |  | 10974   |
| rs2075650  | 15926    | 4729     | 2119     | 528           | .        |  | 23302   |
| rs2083637  | 7197     | 1919     | 1860     | .             | .        |  | 10976   |
| rs2144300  | 14137    | 4370     | 2908     | 944           | *        |  | 22359   |
| rs2156552  | 14226    | 4384     | 2892     | 946           | *        |  | 22448   |
| rs2191349  | 258      | 452      | 256      | 528           | .        |  | 1494    |
| rs2197089  | 14221    | 4383     | 2898     | 947           | *        |  | 22449   |
| rs2200733  | 10065    | 2389     | 777      | 422           | *        |  | 13653   |
| rs2217332  | 7187     | 1916     | 1840     | .             | .        |  | 10943   |
| rs2228145  | 17184    | 5942     | 1841     | .             | .        |  | 24967   |
| rs2228671  | 15900    | 4724     | 2101     | 523           | .        |  | 23248   |
| rs2231142  | 7203     | 1918     | 1872     | .             | .        |  | 10993   |
| rs2237892  | 3494     | 1033     | 253      | 523           | .        |  | 5303    |
| rs2237895  | 4193     | 1779     | 2122     | 519           | .        |  | 8613    |
| rs2237897  | 3961     | 1670     | 1992     | 529           | .        |  | 8152    |
| rs2271293  | 10059    | 2388     | 777      | 422           | *        |  | 13646   |
| rs2304130  | 7206     | 1921     | 1859     | .             | .        |  | 10986   |
| rs2338104  | 7422     | 2585     | 2127     | 526           | .        |  | 12660   |

| SNP        | European | African  | Hispanic | Asian/Pacific | American |  |         |
|------------|----------|----------|----------|---------------|----------|--|---------|
|            | American | American |          | Islander      | Indian   |  | OVERALL |
| rs2383206  | 10766    | 3126     | 2633     | 422           | *        |  | 16947   |
| rs2383207  | 13981    | 1926     | 2625     | *             | *        |  | 18532   |
| rs2383208  | 14265    | 4157     | 2891     | 946           | 3129     |  | 25388   |
| rs2494250  | 6820     | 1799     | 776      | 422           | *        |  | 9817    |
| rs2549513  | 9995     | 2379     | 777      | 422           | *        |  | 13573   |
| rs255049   | 3966     | 1331     | 1859     | .             | .        |  | 7156    |
| rs2605100  | 257      | 454      | 254      | 529           | .        |  | 1494    |
| rs261332   | 3987     | 1675     | 2016     | 511           | .        |  | 8189    |
| rs2650000  | 16506    | 5983     | 2125     | 500           | .        |  | 25114   |
| rs268      | 6818     | 1799     | 777      | 422           | *        |  | 9816    |
| rs2815752  | 14257    | 4174     | 2895     | 946           | *        |  | 22272   |
| rs2877716  | 233      | 433      | 243      | 515           | .        |  | 1424    |
| rs28927680 | 24095    | 7694     | 2632     | 422           | *        |  | 34843   |
| rs2943634  | 6783     | 1791     | 774      | 421           | *        |  | 9769    |
| rs2943641  | 258      | 456      | 255      | 528           | .        |  | 1497    |
| rs2954029  | 19480    | 5931     | 2889     | 949           | *        |  | 29249   |
| rs2967605  | 7135     | 2136     | 1853     | .             | .        |  | 11124   |
| rs2981582  | 6820     | 1799     | 777      | 422           | *        |  | 9818    |
| rs29941    | 251      | 437      | 247      | 512           | .        |  | 1447    |
| rs3018362  | 3955     | 1331     | 1854     | .             | .        |  | 7140    |
| rs3093058  | 12420    | 3680     | 1842     | .             | .        |  | 17942   |
| rs3130340  | 3960     | 1331     | 1858     | .             | .        |  | 7149    |
| rs3135506  | 7142     | 2122     | 1841     | .             | .        |  | 11105   |
| rs328      | 14216    | 4368     | 2875     | 948           | *        |  | 22407   |
| rs340874   | 259      | 455      | 257      | 529           | .        |  | 1500    |
| rs35767    | 256      | 456      | 256      | 526           | .        |  | 1494    |
| rs3736228  | 3945     | 1329     | 1868     | .             | .        |  | 7142    |
| rs3751812  | 10312    | 2844     | 1032     | 948           | *        |  | 15136   |
| rs3764261  | 14222    | 4157     | 2889     | 945           | *        |  | 22213   |
| rs3771362  | 3954     | 1327     | 1856     | .             | .        |  | 7137    |
| rs3846662  | 7175     | 1920     | 1856     | .             | .        |  | 10951   |
| rs3846663  | 3782     | 1242     | 1761     | .             | .        |  | 6785    |
| rs3890182  | 14213    | 4372     | 2878     | 946           | *        |  | 22409   |
| rs3905000  | 7203     | 1920     | 1871     | .             | .        |  | 10994   |
| rs4128725  | 6821     | 1799     | 777      | 422           | *        |  | 9819    |
| rs4131568  | 11314    | 3461     | 1857     | .             | .        |  | 16632   |
| rs4149268  | 11016    | 3577     | 2892     | 946           | *        |  | 18431   |
| rs4149274  | 3960     | 1327     | 1856     | .             | .        |  | 7143    |
| rs429358   | 6993     | 2220     | 1031     | 943           | *        |  | 11187   |

| SNP       | European<br>American | African<br>American | Hispanic | Asian/Pacific<br>Islander | American<br>Indian | OVERALL |
|-----------|----------------------|---------------------|----------|---------------------------|--------------------|---------|
| rs4355801 | 3967                 | 1335                | 1872     | .                         | .                  | 7174    |
| rs4402960 | 14210                | 4371                | 2876     | 946                       | 3129               | 25532   |
| rs4420638 | 21378                | 6076                | 2637     | 422                       | *                  | 30513   |
| rs4506565 | 255                  | 449                 | 255      | 521                       | .                  | 1480    |
| rs4591370 | 3966                 | 1331                | 1862     | .                         | .                  | 7159    |
| rs4605275 | 3211                 | 565                 | .        | .                         | .                  | 3776    |
| rs4607103 | 14225                | 4364                | 2889     | 948                       | 3129               | 25555   |
| rs4689388 | 252                  | 454                 | 257      | 527                       | .                  | 1490    |
| rs4712523 | 14013                | 3717                | 2649     | 422                       | *                  | 20801   |
| rs471364  | 7467                 | 2368                | 2119     | 523                       | .                  | 12477   |
| rs4740635 | 3963                 | 1330                | 1861     | .                         | .                  | 7154    |
| rs4760920 | 7383                 | 2201                | 725      | 388                       | *                  | 10697   |
| rs4775041 | 14200                | 4377                | 2885     | 949                       | *                  | 22411   |
| rs4803750 | 7441                 | 2372                | 2111     | 528                       | .                  | 12452   |
| rs4804611 | 6805                 | 1795                | 777      | 422                       | *                  | 9799    |
| rs4821480 | 7166                 | 2138                | 1865     | .                         | .                  | 11169   |
| rs486394  | 3944                 | 1323                | 1848     | .                         | .                  | 7115    |
| rs4870044 | 3951                 | 1331                | 1858     | .                         | .                  | 7140    |
| rs488507  | 3930                 | 1326                | 1853     | .                         | .                  | 7109    |
| rs4939883 | 7200                 | 1919                | 1875     | .                         | .                  | 10994   |
| rs4970834 | 3812                 | 1312                | 1588     | .                         | .                  | 6712    |
| rs4977574 | 4181                 | 1611                | 723      | 388                       | *                  | 6903    |
| rs499818  | 10046                | 2387                | 776      | 422                       | *                  | 13631   |
| rs501120  | 6813                 | 1789                | 777      | 422                       | *                  | 9801    |
| rs515135  | 3961                 | 1324                | 1869     | .                         | .                  | 7154    |
| rs5215    | 18429                | 4736                | 776      | 421                       | 3129               | 27491   |
| rs5219    | 13945                | 3924                | 2645     | 418                       | 3129               | 24061   |
| rs545854  | 257                  | 455                 | 254      | 529                       | .                  | 1495    |
| rs560887  | 3665                 | 1272                | 1805     | .                         | .                  | 6742    |
| rs562338  | 14224                | 4378                | 2900     | 947                       | *                  | 22449   |
| rs563694  | 3804                 | 1310                | 1579     | .                         | .                  | 6693    |
| rs564398  | 6813                 | 1766                | 767      | 422                       | *                  | 9768    |
| rs599839  | 22427                | 6596                | 2811     | 946                       | *                  | 32780   |
| rs6013029 | 10769                | 3121                | 2631     | 422                       | *                  | 16943   |
| rs6025    | 15292                | 4156                | 777      | 422                       | *                  | 20647   |
| rs602633  | 3961                 | 1326                | 1854     | .                         | .                  | 7141    |
| rs6102059 | 4195                 | 1775                | 2115     | 521                       | .                  | 8606    |
| rs6265    | 4133                 | 1779                | 2126     | 523                       | .                  | 8561    |
| rs646776  | 22652                | 6479                | 2889     | 951                       | *                  | 32971   |
| rs6469804 | 3943                 | 1326                | 1857     | .                         | .                  | 7126    |
| rs6511720 | 24319                | 8158                | 2875     | 947                       | *                  | 36299   |

| SNP       | European<br>American | African<br>American | Hispanic | Asian/Pacific<br>Islander | American<br>Indian | OVERALL |
|-----------|----------------------|---------------------|----------|---------------------------|--------------------|---------|
| rs6544713 | 11045                | 4383                | 2906     | 947                       | *                  | 19281   |
| rs6548238 | 13985                | 3932                | 2649     | 422                       | *                  | 20988   |
| rs6586891 | 14206                | 4376                | 2895     | 950                       | *                  | 22427   |
| rs6589566 | 3964                 | 1329                | 1855     | .                         | .                  | 7148    |
| rs6602024 | 3959                 | 1327                | 1854     | .                         | .                  | 7140    |
| rs6732914 | 6815                 | 1796                | 776      | 422                       | *                  | 9809    |
| rs673548  | 7177                 | 1907                | 1839     | .                         | .                  | 10923   |
| rs6754295 | 3244                 | 590                 |          | .                         | .                  | 3834    |
| rs6756629 | 7208                 | 1923                | 1861     | .                         | .                  | 10992   |
| rs6855911 | 3932                 | 1326                | 1865     | .                         | .                  | 7123    |
| rs6857    | 3955                 | 1331                | 1852     | .                         | .                  | 7138    |
| rs6922269 | 6814                 | 1796                | 777      | 421                       | *                  | 9808    |
| rs6929137 | 3961                 | 1329                | 1854     | .                         | .                  | 7144    |
| rs693     | 15953                | 5630                | 2873     | 943                       | *                  | 25399   |
| rs6987702 | 7188                 | 1919                | 1856     | .                         | .                  | 10963   |
| rs6993813 | 3959                 | 1331                | 1854     | .                         | .                  | 7144    |
| rs7034200 | 259                  | 453                 | 257      | 527                       | .                  | 1496    |
| rs711752  | 3955                 | 1327                | 1856     | .                         | .                  | 7138    |
| rs7120118 | 7053                 | 1903                | 1586     | .                         | .                  | 10542   |
| rs7138803 | 258                  | 453                 | 257      | 525                       | .                  | 1493    |
| rs714052  | 7189                 | 1902                | 1857     | .                         | .                  | 10948   |
| rs7205804 | 4173                 | 1613                | 724      | 388                       | *                  | 6898    |
| rs7220711 | 3947                 | 1319                | 1849     | .                         | .                  | 7115    |
| rs7310409 | 3956                 | 1327                | 1855     | .                         | .                  | 7138    |
| rs7395662 | 7200                 | 1920                | 1857     | .                         | .                  | 10977   |
| rs7412    | 6991                 | 2239                | 1031     | 945                       | *                  | 11206   |
| rs7442295 | 3944                 | 1333                | 1855     | .                         | .                  | 7132    |
| rs7480010 | 7210                 | 1919                | 1857     | .                         | .                  | 10986   |
| rs7498665 | 14244                | 4175                | 2899     | 945                       | *                  | 22263   |
| rs7506045 | 10064                | 2386                | 777      | 421                       | *                  | 13648   |
| rs7524102 | 3964                 | 1329                | 1861     | .                         | .                  | 7154    |
| rs754523  | 13946                | 3708                | 2630     | 421                       | *                  | 20705   |
| rs7557067 | 3968                 | 1335                | 1862     | .                         | .                  | 7165    |
| rs7566605 | 3962                 | 1329                | 1874     | .                         | .                  | 7165    |
| rs7575840 | 3964                 | 1330                | 1859     | .                         | .                  | 7153    |
| rs7578597 | 14018                | 3719                | 2635     | 422                       | 3129               | 23923   |
| rs7595412 | 3959                 | 1330                | 1855     | .                         | .                  | 7144    |
| rs7679    | 3964                 | 2131                | 1874     | .                         | .                  | 7969    |
| rs7754840 | 4206                 | 1778                | 2115     | 527                       | .                  | 8626    |
| rs780094  | 17567                | 6175                | 2130     | 528                       | .                  | 26400   |
| rs7819412 | 3915                 | 1308                | 1860     | .                         | .                  | 7083    |

| SNP       | European<br>American | African<br>American | Hispanic | Asian/Pacific<br>Islander | American<br>Indian | OVERALL |
|-----------|----------------------|---------------------|----------|---------------------------|--------------------|---------|
| rs783396  | 10044                | 2386                | 771      | 422                       | *                  | 13623   |
| rs7861175 | 3967                 | 1331                | 1860     | .                         | .                  | 7158    |
| rs7901695 | 13937                | 3683                | 2621     | 422                       | 3129               | 23792   |
| rs7903146 | 14259                | 4162                | 2872     | 947                       | 3129               | 25369   |
| rs7923837 | 7087                 | 1901                | 1837     | .                         | .                  | 10825   |
| rs7935346 | 3943                 | 1326                | 1850     | .                         | .                  | 7119    |
| rs7944584 | 257                  | 456                 | 257      | 528                       | .                  | 1498    |
| rs7961581 | 7361                 | 2575                | 2111     | 526                       | 3129               | 15702   |
| rs8050136 | 21659                | 6303                | 2869     | 948                       | 3129               | 34908   |
| rs8055236 | 7175                 | 1909                | 1853     | .                         | .                  | 10937   |
| rs864745  | 14241                | 4369                | 2896     | 948                       | 3129               | 25583   |
| rs925946  | 255                  | 451                 | 252      | 520                       | .                  | 1478    |
| rs9282541 | 3969                 | 1332                | 1860     | .                         | .                  | 7161    |
| rs9479055 | 3962                 | 1326                | 1860     | .                         | .                  | 7148    |
| rs9536591 | 10049                | 2384                | 776      | 422                       | *                  | 13631   |
| rs9594738 | 3958                 | 1326                | 1852     | .                         | .                  | 7136    |
| rs9594759 | 3956                 | 1331                | 1852     | .                         | .                  | 7139    |
| rs964184  | 18193                | 5636                | 2890     | 949                       | *                  | 27668   |
| rs987237  | 258                  | 450                 | 251      | 525                       | .                  | 1484    |
| rs9891572 | 7199                 | 1907                | 1851     | .                         | .                  | 10957   |
| rs9930506 | 7049                 | 2251                | 1029     | 948                       | *                  | 11277   |
| rs9939609 | 3454                 | 1254                | 252      | 525                       | .                  | 5485    |
| rs9941349 | 258                  | 453                 | 253      | 524                       | .                  | 1488    |
| rs9989419 | 14243                | 4124                | 2877     | 944                       | *                  | 22188   |
|           |                      |                     |          |                           |                    |         |
|           |                      |                     |          |                           |                    |         |
|           | European<br>American | African<br>American | Hispanic | Asian/Pacific<br>Islander | American<br>Indian | OVERALL |
| Minumum   | 233                  | 433                 | 243      | 388                       | 3129               | 802     |
| Maximum   | 24319                | 8158                | 2908     | 951                       | 3129               | 36299   |
| Mean      | 7722                 | 2367                | 1766     | 617                       | 3129               | 12361   |
| Median    | 6820                 | 1850                | 1857     | 526                       | 3129               | 9818    |
|           |                      |                     |          |                           |                    |         |
| # SNPs    | 265                  | 266                 | 261      | 150                       | 19                 | 266     |

**Supplemental Table 5** – Correlation ( $r^2$ ) between SNPs significantly associated with CRP. Values were obtained from 1000G data for CEU, YRI, and HCB/JPT using SNAP ([www.broadinstitute.org/mpg/snap/ldsearchpw.php](http://www.broadinstitute.org/mpg/snap/ldsearchpw.php), accessed 11/05/2012).

| <b>CRP</b>            |                           |                        |           |           | <b>APOE/APOC1/TOMM40</b> |                         |                         |          |           |
|-----------------------|---------------------------|------------------------|-----------|-----------|--------------------------|-------------------------|-------------------------|----------|-----------|
|                       | European Americans        |                        |           |           |                          | European Americans      |                         |          |           |
|                       | rs1205                    | rs1800947              | rs1417938 | rs4131568 |                          | rs6857                  | rs7412                  | rs429358 | rs2075650 |
| rs1800947             | 0.142                     |                        |           |           | rs4420638                | 0.627                   |                         |          | 0.526     |
| rs1417938             | 0.253                     | 0.036                  |           |           | rs2075650                | 0.844                   | 0.015                   |          |           |
| rs4131568             | 0.119                     | 0.04                   | 0.854     |           | rs429358                 |                         | 0.004                   |          |           |
| rs3093058             |                           |                        |           |           | rs7412                   |                         |                         |          |           |
|                       | African Americans         |                        |           |           |                          | African Americans       |                         |          |           |
|                       | rs1205                    | rs1800947              | rs1417938 | rs4131568 |                          | rs6857                  | rs7412                  | rs429358 | rs2075650 |
| rs1800947             |                           |                        |           |           | rs4420638                | 0.04                    |                         | 0.016    | 0.027     |
| rs1417938             | 0.005                     |                        |           |           | rs2075650                | 0.004                   | 0.06                    | 0.01     |           |
| rs4131568             |                           |                        |           |           | rs429358                 | 0                       | 0.017                   |          |           |
| rs3093058             | 0.001                     | 0.025                  | 0.009     |           | rs7412                   |                         |                         |          |           |
|                       | Asian/Pacific Islanders   |                        |           |           |                          | Asian/Pacific Islanders |                         |          |           |
|                       | rs1205                    | rs1800947              | rs1417938 | rs4131568 |                          | rs6857                  | rs7412                  | rs429358 | rs2075650 |
| rs1800947             | 0.013                     |                        |           |           | rs4420638                | 0.507                   |                         | 0.115    | 0.457     |
| rs1417938             | 0.125                     | 0.002                  |           |           | rs2075650                | 0.905                   | 0.004                   | 0.073    |           |
| rs4131568             | 0.093                     | 0.001                  | 0.741     |           | rs429358                 | 0.08                    |                         |          |           |
| rs3093058             |                           |                        |           |           | rs7412                   |                         |                         |          |           |
|                       | <b>GCKR</b>               |                        |           |           |                          | <b>HNF1A</b>            |                         |          |           |
|                       |                           | rs1260326 and rs780094 |           |           |                          |                         | rs2650000 and rs7310409 |          |           |
| European Americans    |                           | 0.933                  |           |           | European Americans       |                         | 0.47                    |          |           |
| African Americans     |                           | 0.468                  |           |           | African Americans        |                         | 0.069                   |          |           |
| Asian/Pacific Islande |                           | 0.832                  |           |           | Asian/Pacific Islande    |                         | 0.651                   |          |           |
|                       | <b>CELSR2/PSRC1/SORT1</b> |                        |           |           |                          |                         |                         |          |           |
|                       |                           | rs599839 and rs646776  |           |           |                          |                         |                         |          |           |
| European Americans    |                           | 0.895                  |           |           |                          |                         |                         |          |           |
| African Americans     |                           | 0.059                  |           |           |                          |                         |                         |          |           |
| Asian/Pacific Islande |                           | 0.702                  |           |           |                          |                         |                         |          |           |



**Supplemental Table 6** – Association between serum C-reactive protein and SNPs previously associated with inflammation-related phenotypes, stratified by sex and race/ethnicity group.

| Locus | SNP       | Coded allele | Race/ethnicity         | Male N      | Beta         | SE          | P-value          | Female N    | Beta         | SE          | P-value          | P-het |
|-------|-----------|--------------|------------------------|-------------|--------------|-------------|------------------|-------------|--------------|-------------|------------------|-------|
| CRP   | rs1205    | T            | European American      | <b>5838</b> | <b>-0.19</b> | <b>0.02</b> | <b>2.80E-19</b>  | <b>6562</b> | <b>-0.16</b> | <b>0.02</b> | <b>1.62E-14</b>  | 0.29  |
|       |           |              | African American       | <b>1469</b> | <b>-0.29</b> | <b>0.06</b> | <b>4.14E-07</b>  | <b>2200</b> | <b>-0.27</b> | <b>0.04</b> | <b>1.75E-09</b>  | 0.78  |
|       |           |              | Hispanic               | 893         | -0.16        | 0.05        | 4.68E-03         | <b>949</b>  | <b>-0.29</b> | <b>0.05</b> | <b>6.33E-08</b>  | 0.07  |
|       |           |              | Asian/Pacific Islander | 0           | .            | .           | .                | 0           | .            | .           | .                | .     |
|       |           |              | American Indian        | 0           | .            | .           | .                | 0           | .            | .           | .                | .     |
|       |           |              | Overall                | <b>8200</b> | <b>-0.19</b> | <b>0.02</b> | <b>6.29E-26</b>  | <b>9711</b> | <b>-0.19</b> | <b>0.02</b> | <b>5.12E-27</b>  | 1.00  |
| CRP   | rs1800947 | G            | European American      | <b>5837</b> | <b>-0.28</b> | <b>0.04</b> | <b>1.16E-12</b>  | <b>6567</b> | <b>-0.31</b> | <b>0.04</b> | <b>3.52E-14</b>  | 0.60  |
|       |           |              | African American       | 1475        | -0.54        | 0.20        | 5.85E-03         | <b>2201</b> | <b>-0.65</b> | <b>0.16</b> | <b>8.04E-05</b>  | 0.67  |
|       |           |              | Hispanic               | 894         | -0.40        | 0.21        | 6.29E-02         | 948         | -0.33        | 0.17        | 4.83E-02         | 0.80  |
|       |           |              | Asian/Pacific Islander | 0           | .            | .           | .                | 0           | .            | .           | .                | .     |
|       |           |              | American Indian        | 0           | .            | .           | .                | 0           | .            | .           | .                | .     |
|       |           |              | Overall                | <b>8206</b> | <b>-0.30</b> | <b>0.04</b> | <b>1.08E-14</b>  | <b>9716</b> | <b>-0.33</b> | <b>0.04</b> | <b>1.37E-17</b>  | 0.60  |
| CRP   | rs1417938 | A            | European American      | 1924        | -0.08        | 0.04        | 4.29E-02         | <b>2019</b> | <b>-0.20</b> | <b>0.04</b> | <b>1.29E-06</b>  | 0.03  |
|       |           |              | African American       | 631         | -0.26        | 0.12        | 2.38E-02         | 697         | -0.15        | 0.11        | 1.67E-01         | 0.50  |
|       |           |              | Hispanic               | 894         | -0.10        | 0.06        | 6.37E-02         | <b>951</b>  | <b>-0.18</b> | <b>0.05</b> | <b>9.67E-04*</b> | 0.30  |
|       |           |              | Asian/Pacific Islander | 0           | .            | .           | .                | 0           | .            | .           | .                | .     |
|       |           |              | American Indian        | 0           | .            | .           | .                | 0           | .            | .           | .                | .     |
|       |           |              | Overall                | <b>3449</b> | <b>-0.10</b> | <b>0.03</b> | <b>1.24E-03*</b> | <b>3667</b> | <b>-0.19</b> | <b>0.03</b> | <b>2.01E-09</b>  | 0.03  |
| CRP   | rs4131568 | T            | European American      | 5360        | 0.05         | 0.02        | 1.20E-02         | <b>5954</b> | <b>0.10</b>  | <b>0.02</b> | <b>2.93E-06</b>  | 0.08  |
|       |           |              | African American       | 1397        | 0.01         | 0.09        | 9.56E-01         | 2064        | -0.13        | 0.07        | 6.27E-02         | 0.22  |
|       |           |              | Hispanic               | 893         | 0.05         | 0.05        | 3.32E-01         | 964         | 0.11         | 0.05        | 4.88E-02         | 0.40  |
|       |           |              | Asian/Pacific Islander | 0           | .            | .           | .                | 0           | .            | .           | .                | .     |
|       |           |              | American Indian        | 0           | .            | .           | .                | 0           | .            | .           | .                | .     |
|       |           |              | Overall                | 7650        | 0.05         | 0.02        | 8.22E-03         | <b>8982</b> | <b>0.09</b>  | <b>0.02</b> | <b>1.18E-05</b>  | 0.16  |

| Locus                     | SNP       | Coded allele | Race/ethnicity         | Male N       | Beta         | SE          | P-value          | Female N     | Beta         | SE          | P-value         | P-het |
|---------------------------|-----------|--------------|------------------------|--------------|--------------|-------------|------------------|--------------|--------------|-------------|-----------------|-------|
| CRP                       | rs3093058 | T            | European American      | 5846         | 0.61         | 0.29        | 3.63E-01         | 6574         | -0.01        | 0.32        | 9.85E-01        | 0.16  |
|                           |           |              | African American       | 1475         | <b>0.45</b>  | <b>0.06</b> | <b>1.19E-14</b>  | <b>2205</b>  | <b>0.50</b>  | <b>0.05</b> | <b>3.16E-28</b> | 0.55  |
|                           |           |              | Hispanic               | <b>893</b>   | <b>0.90</b>  | <b>0.29</b> | <b>1.86E-03*</b> | 949          | 0.38         | 0.28        | 1.77E-01        | 0.20  |
|                           |           |              | Asian/Pacific Islander | 0            | .            | .           | .                | 0            | .            | .           | .               | .     |
|                           |           |              | American Indian        | 0            | .            | .           | .                | 0            | .            | .           | .               | .     |
|                           |           |              | Overall                | 8214         | 0.48         | 0.06        | <b>3.34E-17</b>  | <b>9728</b>  | <b>0.48</b>  | <b>0.04</b> | <b>4.55E-28</b> | 0.28  |
| APOE/<br>APOC1/<br>TOMM40 | rs4420638 | G            | European American      | <b>6633</b>  | <b>-0.27</b> | <b>0.02</b> | <b>8.89E-30</b>  | <b>14745</b> | <b>-0.23</b> | <b>0.02</b> | <b>1.31E-30</b> | 0.16  |
|                           |           |              | African American       | 1704         | -0.04        | 0.05        | 4.26E-01         | 4372         | -0.03        | 0.03        | 4.47E-01        | 0.86  |
|                           |           |              | Hispanic               | 897          | -0.15        | 0.09        | 8.92E-02         | 1740         | -0.20        | 0.06        | 2.25E-03        | 0.64  |
|                           |           |              | Asian/Pacific Islander | 0            | .            | .           | .                | 422          | -0.06        | 0.14        | 6.76E-01        | .     |
|                           |           |              | American Indian        | 0            | .            | .           | .                | 86†          | .            | .           | .               | .     |
|                           |           |              | Overall                | <b>9234</b>  | <b>-0.23</b> | <b>0.02</b> | <b>6.99E-27</b>  | <b>21365</b> | <b>-0.17</b> | <b>0.02</b> | <b>2.01E-26</b> | 0.03  |
| APOE/<br>APOC1/<br>TOMM40 | rs2075650 | G            | European American      | <b>7277</b>  | <b>-0.23</b> | <b>0.02</b> | <b>5.36E-21</b>  | <b>8649</b>  | <b>-0.22</b> | <b>0.02</b> | <b>2.03E-20</b> | 0.72  |
|                           |           |              | African American       | 2057         | -0.03        | 0.05        | 5.86E-01         | 2672         | -0.01        | 0.05        | 7.69E-01        | 0.78  |
|                           |           |              | Hispanic               | 1078         | -0.23        | 0.07        | 9.68E-04         | 1041         | -0.19        | 0.08        | 2.16E-02        | 0.71  |
|                           |           |              | Asian/Pacific Islander | 306          | -0.02        | 0.06        | 7.84E-01         | 222          | -0.09        | 0.06        | 1.57E-01        | 0.41  |
|                           |           |              | American Indian        | 0            | .            | .           | .                | 0            | .            | .           | .               | .     |
|                           |           |              | Overall                | <b>10718</b> | <b>-0.17</b> | <b>0.02</b> | <b>2.55E-18</b>  | <b>12584</b> | <b>-0.17</b> | <b>0.02</b> | <b>5.64E-18</b> | 1.00  |
| APOE/<br>APOC1/<br>TOMM40 | rs429358  | C            | European American      | 163          | -0.16        | 0.10        | 9.30E-02         | <b>6830</b>  | <b>-0.25</b> | <b>0.04</b> | <b>8.07E-10</b> | 0.40  |
|                           |           |              | African American       | 363          | -0.14        | 0.06        | 3.38E-02         | <b>1857</b>  | <b>-0.30</b> | <b>0.06</b> | <b>7.94E-08</b> | 0.06  |
|                           |           |              | Hispanic               | 182          | -0.22        | 0.11        | 5.33E-02         | <b>849</b>   | <b>-0.42</b> | <b>0.08</b> | <b>1.82E-07</b> | 0.14  |
|                           |           |              | Asian/Pacific Islander | 304          | -0.16        | 0.08        | 4.04E-02         | 639          | -0.21        | 0.06        | 1.33E-03        | 0.62  |
|                           |           |              | American Indian        | 0            | .            | .           | .                | 85†          | .            | .           | .               | .     |
|                           |           |              | Overall                | <b>1012</b>  | <b>-0.16</b> | <b>0.04</b> | <b>1.18E-04</b>  | <b>10260</b> | <b>-0.27</b> | <b>0.03</b> | <b>2.96E-23</b> | 0.03  |

| Locus                     | SNP       | Coded allele | Race/ethnicity         | Male N | Beta  | SE   | P-value   | Female N | Beta  | SE   | P-value  | P-het    |
|---------------------------|-----------|--------------|------------------------|--------|-------|------|-----------|----------|-------|------|----------|----------|
| APOE/<br>APOC1/<br>TOMM40 | rs6857    | T            | European American      | 1932   | -0.24 | 0.05 | 1.08E-06  | 2023     | -0.24 | 0.05 | 9.14E-06 | 1.00     |
|                           |           |              | African American       | 636    | -0.35 | 0.15 | 1.98E-02  | 695      | -0.12 | 0.15 | 4.26E-01 | 0.28     |
|                           |           |              | Hispanic               | 889    | -0.30 | 0.09 | 4.90E-04  | 963      | -0.27 | 0.09 | 2.66E-03 | 0.81     |
|                           |           |              | Asian/Pacific Islander | 0      | .     | .    | .         | 0        | .     | .    | .        | .        |
|                           |           |              | American Indian        | 0      | .     | .    | .         | 0        | .     | .    | .        | .        |
|                           |           |              | Overall                | 1525   | -0.26 | 0.04 | 1.88E-10  | 3681     | -0.24 | 0.04 | 8.71E-08 | 0.72     |
| GCKR                      | rs1260326 | T            | European American      | 7237   | 0.04  | 0.02 | 1.78E-02  | 15424    | 0.13  | 0.01 | 1.68E-18 | 5.70E-05 |
|                           |           |              | African American       | 2047   | 0.07  | 0.04 | 9.54E-02  | 4459     | 0.06  | 0.04 | 8.13E-02 | 0.86     |
|                           |           |              | Hispanic               | 1074   | 0.02  | 0.05 | 6.72E-01  | 1799     | 0.13  | 0.04 | 1.14E-03 | 0.09     |
|                           |           |              | Asian/Pacific Islander | 306    | 0.06  | 0.05 | 1.97E-01  | 645      | 0.12  | 0.04 | 2.45E-03 | 0.35     |
|                           |           |              | American Indian        | 0      | .     | .    | .         | 86†      | .     | .    | .        | .        |
|                           |           |              | Overall                | 10664  | 0.04  | 0.01 | 2.10E-03  | 22413    | 0.12  | 0.01 | 8.96E-23 | 1.54E-08 |
| GCKR                      | rs780094  | T            | European American      | 8045   | 0.05  | 0.02 | 3.00E-03* | 9522     | 0.14  | 0.02 | 9.76E-17 | 1.46E-03 |
|                           |           |              | African American       | 2660   | 0.02  | 0.04 | 5.94E-01  | 3515     | 0.05  | 0.04 | 1.61E-01 | 0.60     |
|                           |           |              | Hispanic               | 1085   | 0.03  | 0.05 | 5.36E-01  | 1045     | 0.13  | 0.05 | 8.84E-03 | 0.16     |
|                           |           |              | Asian/Pacific Islander | 305    | 0.02  | 0.05 | 6.09E-01  | 223      | 0.08  | 0.05 | 1.15E-01 | 0.40     |
|                           |           |              | American Indian        | 0      | .     | .    | .         | 0        | .     | .    | .        | .        |
|                           |           |              | Overall                | 12095  | 0.04  | 0.01 | 2.85E-03* | 14305    | 0.12  | 0.01 | 4.74E-18 | 1.54E-08 |
| HNF1A                     | rs2650000 | A            | European American      | 7592   | -0.15 | 0.02 | 5.52E-18  | 8914     | -0.10 | 0.02 | 1.78E-08 | 0.08     |
|                           |           |              | African American       | 2588   | -0.04 | 0.04 | 4.23E-01  | 3395     | -0.14 | 0.04 | 1.36E-03 | 0.08     |
|                           |           |              | Hispanic               | 1082   | -0.12 | 0.04 | 8.76E-03  | 1043     | -0.11 | 0.05 | 2.03E-02 | 0.98     |
|                           |           |              | Asian/Pacific Islander | 283    | -0.08 | 0.05 | 1.04E-01  | 217      | 0.01  | 0.05 | 7.76E-01 | 0.20     |
|                           |           |              | American Indian        | 0      | .     | .    | .         | 0        | .     | .    | .        | .        |
|                           |           |              | Overall                | 11545  | -0.13 | 0.01 | 1.48E-18  | 13569    | -0.09 | 0.01 | 1.16E-10 | 0.01     |

| Locus | SNP       | Coded allele | Race/ethnicity         | Male N | Beta  | SE   | P-value   | Female N | Beta  | SE   | P-value  | P-het |
|-------|-----------|--------------|------------------------|--------|-------|------|-----------|----------|-------|------|----------|-------|
| HNF1A | rs7310409 | A            | European American      | 1931   | -0.20 | 0.04 | 5.15E-08  | 2025     | -0.15 | 0.04 | 2.76E-04 | 0.16  |
|       |           |              | African American       | 633    | -0.16 | 0.08 | 4.96E-02  | 694      | -0.12 | 0.08 | 1.10E-01 | 0.76  |
|       |           |              | Hispanic               | 892    | -0.17 | 0.06 | 1.72E-03* | 963      | -0.09 | 0.05 | 1.18E-01 | 0.32  |
|       |           |              | Asian/Pacific Islander | 0      | .     | .    | .         | 0        | .     | .    | .        | .     |
|       |           |              | American Indian        | 0      | .     | .    | .         | 0        | .     | .    | .        | .     |
|       |           |              | Overall                | 3456   | -0.19 | 0.03 | 5.44E-11  | 3682     | -0.13 | 0.03 | 3.06E-05 | 0.08  |
| IL6R  | rs2228145 | C            | European American      | 7841   | -0.12 | 0.02 | 2.81E-12  | 9343     | -0.09 | 0.02 | 8.55E-09 | 0.29  |
|       |           |              | African American       | 2373   | -0.15 | 0.05 | 1.47E-03* | 3569     | -0.10 | 0.04 | 1.11E-02 | 0.44  |
|       |           |              | Hispanic               | 886    | -0.22 | 0.05 | 4.57E-05  | 955      | -0.14 | 0.05 | 7.81E-03 | 0.26  |
|       |           |              | Asian/Pacific Islander | 0      | .     | .    | .         | 0        | .     | .    | .        | .     |
|       |           |              | American Indian        | 0      | .     | .    | .         | 0        | .     | .    | .        | .     |
|       |           |              | Overall                | 11100  | -0.13 | 0.02 | 1.87E-17  | 13867    | -0.10 | 0.01 | 1.21E-11 | 0.18  |
| LEPR  | rs1892534 | T            | European American      | 5377   | -0.06 | 0.02 | 6.69E-03  | 5967     | -0.10 | 0.02 | 2.06E-06 | 0.16  |
|       |           |              | African American       | 1402   | -0.07 | 0.05 | 1.59E-01  | 2069     | -0.09 | 0.04 | 1.19E-02 | 0.76  |
|       |           |              | Hispanic               | 893    | -0.08 | 0.05 | 1.26E-01  | 958      | -0.15 | 0.05 | 4.82E-03 | 0.32  |
|       |           |              | Asian/Pacific Islander | 0      | .     | .    | .         | 0        | .     | .    | .        | .     |
|       |           |              | American Indian        | 0      | .     | .    | .         | 0        | .     | .    | .        | .     |
|       |           |              | Overall                | 7672   | -0.06 | 0.02 | 7.12E-04* | 8994     | -0.11 | 0.02 | 2.01E-09 | 0.08  |
| HNF4A | rs1800961 | T            | European American      | 8093   | -0.12 | 0.05 | 1.03E-02  | 9567     | -0.16 | 0.05 | 3.11E-04 | 0.57  |
|       |           |              | African American       | 2678   | -0.20 | 0.14 | 1.53E-01  | 3544     | 0.26  | 0.16 | 9.26E-02 | 0.03  |
|       |           |              | Hispanic               | 1079   | -0.24 | 0.11 | 3.28E-02  | 1038     | 0.12  | 0.12 | 3.15E-01 | 0.03  |
|       |           |              | Asian/Pacific Islander | 301    | -0.23 | 0.24 | 3.36E-01  | 222      | .     | .    | .        | .     |
|       |           |              | American Indian        | 0      | .     | .    | .         | 0        | .     | .    | .        | .     |
|       |           |              | Overall                | 12151  | -0.15 | 0.04 | 3.25E-04  | 14371    | -0.10 | 0.04 | 1.38E-02 | 0.38  |

| Locus                     | SNP      | Coded allele | Race/ethnicity         | Male N | Beta  | SE   | P-value  | Female N     | Beta        | SE          | P-value         | P-het |
|---------------------------|----------|--------------|------------------------|--------|-------|------|----------|--------------|-------------|-------------|-----------------|-------|
| CELS2/<br>PSRC1/<br>SORT1 | rs599839 | G            | European American      | 7119   | 0.05  | 0.02 | 1.06E-02 | 15308        | 0.05        | 0.02        | 1.34E-03        | 1.00  |
|                           |          |              | African American       | 2093   | 0.00  | 0.03 | 9.45E-01 | 4503         | 0.06        | 0.03        | 2.16E-02        | 0.16  |
|                           |          |              | Hispanic               | 1041   | 0.10  | 0.05 | 5.83E-02 | 1770         | 0.03        | 0.04        | 4.30E-01        | 0.27  |
|                           |          |              | Asian/Pacific Islander | 304    | 0.00  | 0.07 | 9.97E-01 | 642          | 0.13        | 0.09        | 1.26E-01        | 0.25  |
|                           |          |              | American Indian        | 0      | .     | .    | .        | 86†          | .           | .           | .               | .     |
|                           |          |              | Overall                | 10557  | 0.04  | 0.02 | 8.19E-03 | <b>22309</b> | <b>0.06</b> | <b>0.01</b> | <b>1.25E-05</b> | 0.37  |
| CELS2/<br>PSRC1/<br>SORT1 | rs646776 | C            | European American      | 7248   | 0.05  | 0.02 | 1.67E-02 | 15404        | 0.05        | 0.02        | 1.70E-03        | 1.00  |
|                           |          |              | African American       | 2034   | 0.04  | 0.03 | 2.03E-01 | 4445         | 0.02        | 0.03        | 4.43E-01        | 0.64  |
|                           |          |              | Hispanic               | 1076   | 0.08  | 0.06 | 1.51E-01 | 1813         | 0.01        | 0.04        | 8.16E-01        | 0.33  |
|                           |          |              | Asian/Pacific Islander | 306    | -0.01 | 0.08 | 8.85E-01 | 645          | 0.22        | 0.09        | 1.72E-02        | 0.06  |
|                           |          |              | American Indian        | 0      | .     | .    | .        | 86†          | .           | .           | .               | .     |
|                           |          |              | Overall                | 10664  | 0.05  | 0.02 | 3.61E-03 | 22393        | 0.05        | 0.01        | 4.90E-04        | 1.00  |

\*P-values below threshold for replication ( $p < 3.1 \times 10^{-3}$ ) but not pleiotropy discovery ( $p < 2.0 \times 10^{-4}$ ).

†Race-stratified analyses with <100 observations that were not analyzed or included in overall count or analyses.

**Supplemental Figure 1** – Forest plots for the association of SNPs rs2075650 (1a) and rs4420638 (1b) with C-reactive protein, overall and by race/ethnicity group, using random effects meta-analysis.

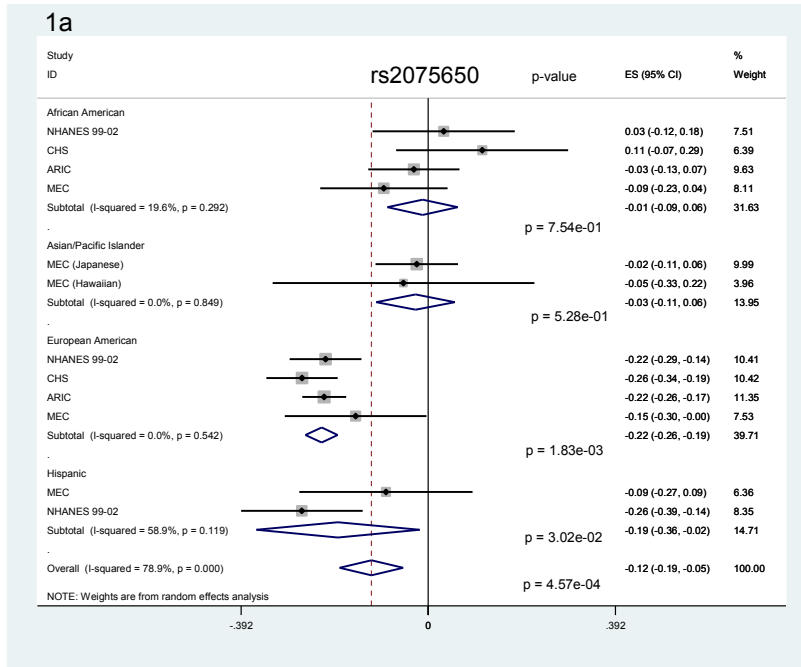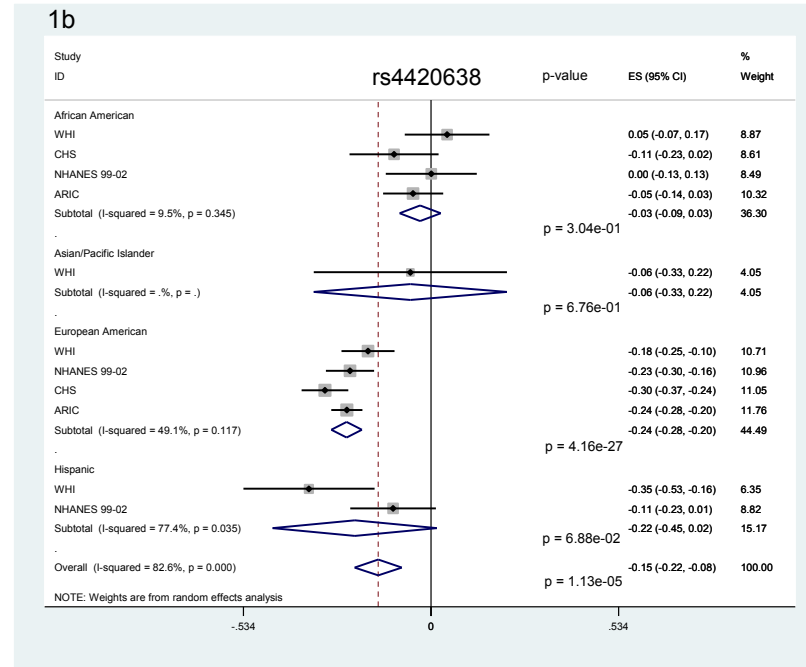

Supplement: NIHMS575195-supplement-000173_-_Supplemental_Material.pdf [file NIHMS575195-supplement-000173_-_Supplemental_Material.pdf]
